# 1 **Shared genetic contribution to type 1 and type 2 diabetes risk**

2 Anthony Aylward<sup>\*1</sup>, Joshua Chiou<sup>\*2</sup>, Mei-Lin Okino<sup>3</sup>, Nikita Kadakia<sup>3</sup>, Kyle J Gaulton<sup>#,3</sup>

3

4 1. Bioinformatics and Systems Biology Graduate Program, University of California, San Diego,  
5 9500 Gilman Drive, La Jolla, CA 92093, USA

6 2. Biomedical Sciences Graduate Program, University of California, San Diego, 9500 Gilman  
7 Drive, La Jolla, CA 92093, USA

8 3. Department of Pediatrics, University of California San Diego, La Jolla CA

9

10 \* These authors contributed equally to this work

11 # Corresponding author: kgaulton@ucsd.edu

12

## 13 **Abstract**

14 The role of shared genetic risk in the etiology of type 1 diabetes (T1D) and type 2 diabetes (T2D)  
15 and the mechanisms of these effects is unknown. In this study, we generated T1D association  
16 data of 15k samples imputed into the HRC reference panel which we compared to T2D  
17 association data of 159k samples imputed into 1000 Genomes. The effects of genetic variants on  
18 T1D and T2D risk at known loci and genome-wide were positively correlated, which we replicated  
19 using data from the UK Biobank and clinically-defined diabetes in the WTCCC. Increased risk of  
20 T1D and T2D was correlated with higher fasting insulin and fasting glucose level and decreased  
21 birth weight, among T1D- and T2D-specific correlations, and T1D and T2D associated variants  
22 were enriched in regulatory elements for pancreatic, insulin resistance (adipose, CD19+ B cell),  
23 and developmental (CD184+ endoderm) cell types. We fine-mapped causal variants at known  
24 T1D and T2D loci and found evidence for co-localization at five signals, four of which had same  
25 direction of effect, including *CENPW* and *GLIS3*. Shared risk variants at *GLIS3* and other signals  
26 were associated with measures of islet function, while *CENPW* was associated with early growth,  
27 and we identified shared risk variants at *GLIS3* in islet accessible chromatin with allelic effects on  
28 islet regulatory activity. Our findings support shared genetic risk involving variants affecting islet  
29 function as well as insulin resistance, growth and development in the etiology of T1D and T2D.

30

31

32

33

34

## 35 Introduction

36

37 Diabetes affects over 400 million individuals worldwide and contributes to substantial morbidity  
38 and mortality<sup>1</sup>. Type 1 diabetes (T1D) is an autoimmune disease resulting in destruction of  
39 pancreatic beta cells, whereas type 2 diabetes (T2D) is a metabolic disease of insulin resistance  
40 and beta cell dysfunction<sup>2</sup>. Genetics plays a major role in both forms of diabetes, where 58 risk  
41 signals have been identified for T1D<sup>3</sup> and over 100 for T2D<sup>4,5</sup>. Roughly half of the genetic risk for  
42 T1D can be attributed to the HLA locus, and many known T1D risk loci affect immune function<sup>2</sup>.  
43 Conversely, the majority of known T2D risk loci appear to affect pancreatic islet and insulin  
44 resistance tissues such as adipocytes and skeletal muscle<sup>6-10</sup>. Outside of known loci there are  
45 many additional genetic factors influencing diabetes risk<sup>8</sup>. Pathophysiological links have been  
46 reported between T1D and T2D suggesting an underlying shared etiology<sup>11,12</sup>, but the contribution  
47 of genetic variants to this shared etiology and the underlying molecular and physiological  
48 mechanisms are unknown.

49

50 Multiple genomic loci that affect risk of both T1D and T2D have been identified. One example is  
51 the *CTRB1* locus, where risk variants are correlated with chymotrypsin expression in the pancreas  
52 and pancreatic islets and GLP-1 mediated insulin secretion<sup>13</sup>. Another example is *GLIS3*, a gene  
53 that causes monogenic neonatal diabetes<sup>14</sup>. A linkage study in non-obese diabetic (NOD) mice  
54 identified an effect of the *GLIS3* locus on T1D progression, suggesting an underlying pancreatic  
55 beta cell phenotype<sup>12</sup>. This study further argued that beta cell ‘fragility’ involving the unfolded  
56 protein response leading to pronounced cell death underlies shared T1D and T2D risk<sup>15</sup>.  
57 However, the specific causal variants at shared risk loci, including whether the signals are the  
58 same or distinct, and the mechanisms of how they alter genomic and cellular functions to influence  
59 disease risk are unknown. Furthermore, shared loci appear to have both opposite (*CTRB1*) and  
60 same (*GLIS3*) direction of effect on T1D and T2D risk, and thus the broader relationship between  
61 genetic effects on T1D and T2D is unclear.

62

63 Genome-wide association data of variant genotypes imputed into comprehensive reference  
64 panels enables understanding broad relationships to other traits and functional annotations<sup>16-18</sup>.  
65 In addition, these data enable fine-mapping of causal variants and mechanisms underlying  
66 diabetes risk at specific loci<sup>8</sup>. Previous fine-mapping studies of T1D and T2D loci resolved sets  
67 of causal variants at many risk signals and annotations enriched in these causal variant sets<sup>3,19</sup>.  
68 These studies revealed that the majority of risk signals for diabetes map in regulatory elements

69 active in specific cell-types and thus likely affect gene regulation in these cells<sup>3,8,19</sup>. Projects such  
70 as ENCODE and the NIH Epigenome Roadmap have annotated regulatory elements in hundreds  
71 of human cells and tissues<sup>20,21</sup>, while other studies have provided detailed regulatory maps of  
72 specific tissues such as islets and adipocytes<sup>6,22</sup>. Epigenomic annotations broadly enriched for  
73 disease signals can further be used to prioritize potential functions of causal variants overlapping  
74 these annotations for experimental validation<sup>19</sup>.

75

76 Here, we studied genetic risk of T1D and T2D using comprehensive genome-wide association  
77 data for both traits. We identified positive correlations both genome-wide and at known loci  
78 between variant effects on T1D and T2D risk. Increased risk of T1D and T2D was correlated with  
79 higher fasting insulin and glucose level and decreased birth weight, among other traits, and  
80 variants with T1D and T2D association were enriched in pancreatic islet, adipocyte, CD19+ B cell,  
81 and CD184+ endoderm regulatory elements. We identified evidence of co-localized signals for  
82 T1D and T2D at five loci, four of which had the same direction of effect. Shared signals at *GLIS3*  
83 and other loci were associated with quantitative measures of beta cell function, while *CENPW*  
84 was associated with early growth phenotypes. We fine-mapped casual variants at shared signals  
85 and identified variants at *GLIS3* in islet accessible chromatin with allelic effects on enhancer  
86 activity. Together our results provide evidence for shared risk underlying T1D and T2D involving  
87 variants with effects on pancreatic islets and well as insulin resistance, growth, and development.

88

## 89 Results

90

91 We generated genome-wide association data for T1D using publicly-available genotype data of  
92 T1D case and control samples of European ancestry (**see Methods, Figure S1**). We imputed  
93 genotypes from each study into 39M variants in the Haplotype Reference Consortium (HRC)  
94 panel<sup>23</sup>. Imputed genotypes passing quality filters ( $r^2 > .3$ ) were tested for T1D association  
95 separately for different genotyping platforms using firth-biased regression including sex and the  
96 top 3 principal components as covariates. We then performed inverse variance weighted meta-  
97 analysis to combine results. We retained imputed variants tested in all samples with minor allele  
98 frequency (MAF)  $> .005$ , resulting in 8.5M variants. As expected, given comparable sample size  
99 to previous studies, variants with genome-wide significant association mapped to known loci  
100 (**Figure S1**).

101

102 We then determined the relationship between variant effects on T1D and T2D risk by comparing  
103 T1D association statistics with T2D association from the DIAGRAM consortium<sup>4</sup>. We first  
104 determined shared effects among variants at known risk loci for both traits excluding the MHC  
105 locus. There was an enrichment of nominal T1D association ( $P < .05$ ) among 93 known T2D index  
106 variants relative to matched background variants (obs=19.1%, exp=7.8%, binomial  $P = 3.2 \times 10^{-4}$ )  
107 (**Figure 1A, Table S1**). T2D index variants were also enriched for concordant direction of effect  
108 on T1D (57/94, binomial  $P = .037$ ), including among those with nominal T1D association (T1D  
109  $P < .05$ ) (14/18, binomial  $P = .031$ ) (**Figure 1B, Table S1**). We found significant directional  
110 concordance among the 14 variants with both nominal T1D association and same direction of  
111 effect on T2D using summary data from UK Biobank (UKBB) (12/14, binomial  $P = .013$ ). Despite  
112 a net sharing in effects, several T2D loci had opposite effects on T1D risk including *CTRB1* and  
113 *TCF7L2* (**Figure 1B**). Conversely, there was less evidence for enrichment of nominal T2D  
114 association (obs=12.2%, exp=7.3%, binomial  $P = .19$ ) or concordant direction of effect (28/57,  
115 binomial  $P = 1$ ) among 57 known T1D variants (**Figure 1A, Table S2**).

116  
117 We then determined the correlation between variant effects genome-wide on T1D and T2D risk.  
118 In these analyses, we used LD-score regression on the set of HapMap3 variants common to T1D  
119 and T2D association datasets (**see Methods**). We observed evidence for a positive correlation in  
120 the effects of variants genome-wide on T1D and T2D risk ( $R_g = .14$ ) (**Figure 1C**). A positive  
121 correlation remained when performing these analyses using summary data of T1D and T2D from  
122 the UK Biobank (T1D/T2D-UKBB  $R_g = .12$ , T1D-UKBB/T2D  $R_g = .23$ ) (**Figure 1C**). We also  
123 identified positive correlation with T1D risk when using T2D association data imputed from  
124 different reference panels (GoT2D, HM2) ( $R_g = .18$ ,  $R_g = .23$ ) and from trans-ethnic cohorts ( $R_g = .22$ )  
125 (**Figure 1C**). To limit the potential effects of misdiagnosed diabetes on these results, we first  
126 generated association data using clinical definitions of T1D and T2D in the WTCCC and observed  
127 a positive correlation when using either T1D or T2D WTCCC dataset (T2D-WTCCC  $R_g = .14$ ; T1D-  
128 WTCCC  $R_g = .13$ ) (**see Methods**). Second, we removed obese ( $BMI > 30$ ) samples from T1D  
129 cohorts and the positive correlation with T2D remained ( $R_g = .14$ ) (**Figure 1C**). These results  
130 demonstrate evidence for correlated effects of variants genome-wide on risk of T1D and T2D.

131  
132 Given evidence for a positive correlation in variant effects on T1D and T2D, we sought to  
133 understand potential mechanisms underlying the shared effects. We first determined the  
134 correlation between T1D and T2D risk and relevant traits using LD score regression<sup>24-27</sup>. For T2D,  
135 there was a significant correlation between T2D risk and increased HbA1C level ( $R_g = .64$ ,

136  $P=3.1 \times 10^{-15}$ ), fasting glucose level ( $R_g=.57$ ,  $P=4.2 \times 10^{-11}$ ), fasting insulin level ( $R_g=.48$ ,  $P=2.9 \times 10^{-9}$ ), HOMA-IR ( $R_g=.55$ ,  $P=1.9 \times 10^{-7}$ ), and body-mass index (BMI) ( $R_g=.48$ ,  $P=3.9 \times 10^{-36}$ ), and  
137 decreased birth weight ( $R_g=-.28$ ,  $P=1.2 \times 10^{-8}$ ) (**Figure 2A**). There was also evidence for a  
138 correlation between T2D risk and increased proinsulin level ( $R_g=.22$ ,  $P=.057$ ) and male pubertal  
139 size ( $R_g=.12$ ,  $P=.14$ ) although these estimates were not significant. For T1D, we observed a  
140 correlation between T1D risk and increased fasting proinsulin ( $R_g=.23$ ,  $P=.034$ ) and fasting insulin  
141 level ( $R_g=.17$ ,  $P=.047$ ) (**Figure 2A**). We also observed evidence for a correlation between T1D  
142 risk and decreased birth weight ( $R_g=-.09$ ,  $P=.10$ ), increased male pubertal size ( $R_g=.18$ ,  $P=.11$ ),  
143 and increased fasting glucose level ( $R_g=.07$ ,  $P=.32$ ) although these estimates were not significant.  
144 We did not observe correlation between T1D and BMI ( $R_g=-0.02$ ,  $P=.52$ ) or childhood obesity  
145 ( $R_g=-0.02$ ,  $P=.75$ ), the latter previously identified as an instrumental variable for T1D risk<sup>28</sup>.

147  
148 We determined the extent to which traits correlated with both T1D and T2D risk might be driven  
149 through variants with shared effects on T1D and T2D. From genome-wide association data for  
150 T1D and T2D, we extracted variants with the same direction of effect and tested these variants  
151 for correlation to each trait using LD score regression. For both T1D and T2D, we observed  
152 stronger correlations with increased fasting glucose level (T1D shared  $R_g=.43$ , T2D shared  
153  $R_g=.65$ ), increased fasting insulin level (T1D shared  $R_g=.55$ , T2D shared  $R_g=.68$ ), and decreased  
154 birth weight (T1D shared  $R_g=.25$ , T2D shared  $R_g=.29$ ) among variants with same direction of  
155 effect (**Figure 2B**). We observed less evidence for pronounced correlation between shared effect  
156 T1D and T2D variants and fasting proinsulin level (T1D shared  $R_g=.33$ , T2D shared  $R_g=.28$ ), and  
157 male pubertal growth (T1D shared  $R_g=.26$ , T2D shared  $R_g=.16$ ) (**Figure 2B**).

158  
159 We next determined functional annotations enriched for T1D and T2D associated variants. We  
160 used annotations of active enhancer and promoter elements in 98 cell types from the Epigenome  
161 roadmap project<sup>21</sup> and annotations of protein-coding gene exons and UTRs from GENCODE<sup>29</sup>.  
162 We tested for enrichment of each annotation for T1D and T2D risk using stratified LD score  
163 regression<sup>17</sup>. There was evidence for positive enrichment genome-wide of both T1D and T2D  
164 association for variants in pancreatic islet (T1D  $Z=1.02$ , T2D  $Z=2.67$ ), adipose nuclei (T1D  $Z=.09$ ,  
165 T2D  $Z=1.52$ ), CD19+ B cell (T1D  $Z=3.12$ , T2D  $Z=.31$ ), CD184+ endoderm (T1D  $Z=.62$ , T2D  
166  $Z=1.25$ ), and pancreas (T1D  $Z=.41$ , T2D  $Z=.62$ ) regulatory elements (**Figure 2C**). We also  
167 observed enrichments specific to each trait, most notably T1D association for immune regulatory  
168 elements such as T cell ( $Z=4.67$ ) and fetal thymus ( $Z=1.83$ ) (**Table S4**).

169

170 Given enrichment of multiple cell-types for both T1D and T2D association, we next tested to what  
171 extent these effects were driven through variants with same direction of effect on T1D and T2D.  
172 We obtained LD-pruned variants nominally associated ( $P < .05$ ) with both T1D and T2D and with  
173 same direction of effect and tested for enrichment of overlap with each annotation compared to  
174 random sets of matched variants (**see Methods**). We observed significant enrichment of overlap  
175 with CD184+ endoderm (Fisher's  $P = .017$ ), adipose nuclei ( $P = .018$ ) and pancreatic islet ( $P = .040$ )  
176 regulatory sites (**Figure 2D**). We next repeated these analyses instead using variants with  
177 opposite direction of effect on T1D and T2D. We observed significant overlap of opposite effect  
178 variants with CD184+ endoderm ( $P = .031$ ) and pancreatic islet regulatory elements ( $P = .020$ ),  
179 suggesting that these cell-types are enriched in variants with both shared and opposite effects on  
180 T1D and T2D.

181  
182 We next used association data to fine-map specific causal variants influencing T1D and T2D. For  
183 T2D we compiled fine-mapping data of 93 signals from previous studies (**see Methods**). As fine-  
184 mapping data for all known T1D loci have not been previously reported, we used T1D association  
185 statistics to fine-map 57 T1D risk signals excluding the MHC region. At each locus, we considered  
186 the index variant for the locus and all variants in at least low LD ( $r^2 > .1$ ). We then used a Bayesian  
187 approach to calculate the posterior causal probability (PPA) for each variant, and 'credible sets'  
188 of variants explaining 99% of the total PPA (**see Methods, Figure 3A, Table S5**). T1D credible  
189 sets contained a median of 66 variants, and 15 loci had 25 or fewer credible set variants. We  
190 compared fine-mapping for 34 loci common to our data and ImmunoChip fine-mapping<sup>3</sup>, and found  
191 a strong correlation between T1D association for credible set variants (Pearson  $r = .93$ ). Credible  
192 set sizes at these 34 loci were larger in our data than for ImmunoChip (median=37, ImmunoChip  
193 median=31), likely reflecting increased variant density. We also identified high probability variants  
194 not covered in ImmunoChip credible sets for example at *CTSH* (rs12592898, PPA=.19).

195  
196 Given fine-mapping of known T1D and T2D signals, we next determined genomic annotations of  
197 candidate causal variants at these signals. For each signal, we calculated the cumulative PPA of  
198 variants overlapping T1D/T2D enriched annotations including pancreas, adipose, endoderm and  
199 immune cell regulatory elements as well as protein-coding exons. We then grouped signals  
200 based on the resulting cumulative PPA values for each annotation (**see Methods**). For T1D,  
201 signals mapped into distinct groups of immune cell regulatory elements (31 signals), pancreas  
202 regulatory elements (6 signals), and coding exons (4 signals) as well as 15 un-annotated signals  
203 (**Figure 3B**). For T2D, signals also mapped into distinct groups including pancreas regulatory

204 elements (21 signals), adipose regulatory elements (15 signals), and coding exons (4 signals)  
205 (**Figure S2**). T1D pancreas signals were associated with T2D risk (median  $-\log_{10}(P)=1.37$ ),  
206 whereas other T1D groups did not show evidence for T2D association (**Figure 3C**). Among T1D  
207 signals in the pancreas group were those with known T2D association such as *GLIS3* and *CTRB1*,  
208 as well as others with nominal T2D association such as *ERBB3*.

209  
210 Several loci have been reported to influence risk of both T1D and T2D, but whether risk signals  
211 have shared or distinct causal variants is unknown. We cataloged 144 loci with known association  
212 to either form of diabetes and tested for shared causal variants using Bayesian co-localization  
213 (**see Methods, Table S6**). There was co-localization of risk signals ( $P_{\text{shared}} > .50$ ) at three known  
214 T1D and T2D loci *CENPW* ( $P_{\text{shared}}=.88$ ), *CTRB1* ( $P_{\text{shared}}=.88$ ), and *GLIS3* ( $P_{\text{shared}}=.62$ ) as well as  
215 evidence for putative co-localization of signals at known T2D loci *BCL11A* ( $P_{\text{shared}}=.73$ ) and  
216 *THADA* ( $P_{\text{shared}}=.68$ ) (**Figure 4A**). All shared risk signals except for *CTRB1* had the same  
217 direction of effect on T1D and T2D risk. At *RASGRP1*, which has reported association to both  
218 T1D and T2D, we found no evidence for either state ( $P_{\text{distinct}}=.03$ ,  $P_{\text{shared}}=.02$ ) (**Table S5**). At  
219 several loci including *MTMR3* and *ZMIZ1*, there was evidence for two distinct T1D and T2D  
220 signals ( $P_{\text{distinct}} > .5$ ) (**Figure 4A**). We fine-mapped causal variants at co-localized signals by  
221 combining T1D and T2D evidence (**see Methods**). There was a reduction in credible set size at  
222 shared loci, including fewer than 10 variants at *GLIS3* (9 vars) and *CTRB1* (8 vars) (**Figure 4B**,  
223 **Figure S3, Table S7**). We further confirmed evidence ( $CLPP > .01$ ) for shared causal variants at  
224 the *GLIS3* and *CTRB1* signals using eCAVIAR (**see Methods, Figure S3, Table S7**).

225  
226 To understand mechanisms of how the shared T1D and T2D signals influence diabetes risk, we  
227 examined quantitative trait associations at shared signals<sup>24,30–32</sup>. At *GLIS3*, risk alleles were  
228 associated with increased fasting glucose level (rs10758593  $Z=4.51$ ) and decreased HOMA-B  
229 ( $Z=-4.54$ ) as well as decreased birth weight ( $Z=-2.27$ ) (**Figure 4C**). At *CTRB1*, risk alleles for T2D  
230 were nominally associated with higher fasting glucose (rs8056814  $Z=2.27$ ) and decreased birth  
231 weight ( $Z=-3.78$ ). At *CENPW*, risk alleles were also nominally associated with higher fasting  
232 glucose (rs4565329  $Z=2.32$ ) and decreased birth weight ( $Z=2.97$ ), as well as increased male  
233 pubertal size ( $Z=3.14$ ), height ( $Z=13$ ), and earlier age of menarche ( $Z=-8.9$ ). Among putative  
234 shared signals, variants at *THADA* were associated with increased fasting glucose level ( $Z=3.65$ )  
235 and decreased HOMA-B ( $Z=-4.23$ ).

236

237 Multiple shared T1D and T2D signals likely affect beta cell function, and thus we annotated  
238 variants in islet regulatory sites at these signals. We used accessible chromatin sites merged  
239 from ATAC-seq in six islet samples<sup>33,34</sup> (**Table S8**), chromatin states created from islet histone  
240 modification ChIP-seq data<sup>6,35</sup>, islet transcription factor (TF) ChIP-seq sites<sup>6</sup>, and TF footprints  
241 generated in islet ATAC-seq using CENTIPEDE<sup>33</sup> (**see Methods**). At *GLIS3*, rs4237150  
242 (PPA=.20), rs10116772 (PPA=.15) and rs10814915 (PPA=.007) mapped in islet accessible  
243 chromatin, active enhancer, and disrupted TF footprints, as well as islet TF ChIP-seq for  
244 rs4237150 (**Figure 4D, Table S7**). At *CTRB1*, rs8056814 (PPA=.91) also mapped in islet  
245 accessible chromatin, active enhancer and disrupted TF footprints (**Figure S4, Table S7**).

246  
247 We tested these shared variants at *GLIS3* and *CTRB1*, and another nearby *GLIS3* candidate  
248 variant rs6476839, for effects on islet regulatory activity. We cloned sequence surrounding  
249 variant alleles into reporter vectors in both forward and reverse orientations, and transfected  
250 constructs into the islet cell line MIN6. As rs10116772 and rs10814915 were within 3bp, we  
251 cloned these variants in the same construct. At *GLIS3*, there was a significant allelic difference  
252 in enhancer activity in both orientations for rs4237150 (Two-sided t-test Fwd  $P=1.2 \times 10^{-4}$ ; Rev  
253  $P=.024$ ), as well as evidence in one orientation only for the rs10116772+rs10814915 and  
254 rs6476839 constructs (**Figure 4E**). We further identified evidence for allelic imbalance in islet  
255 ChIP-seq reads from samples estimated to be heterozygous for these *GLIS3* variants (**see**  
256 **Methods; Figure S5**). At *CTRB1*, we observed significant allelic difference in repressor activity  
257 for rs8056814 (Fwd  $P=.017$ ; Rev  $P=6.7 \times 10^{-4}$ ; **Figure S4**).

## 258 259 Discussion

260  
261 Comparison of variant effects on T1D and T2D genome-wide, across known loci, and at individual  
262 loci provide evidence for shared genetic risk underlying the two major forms of diabetes. A recent  
263 study determined that a subset of patients with later-onset T1D are misdiagnosed with T2D<sup>36</sup>.  
264 This is unlikely to explain a positive correlation between T1D and T2D given that we observed no  
265 enrichment of T2D association or concordance in effect direction among known T1D variants,  
266 even among large effect T1D variants, and the correlation remained when using clinically defined  
267 T2D in the WTCCC with no T1D relatives, negative anti-GAD, and >1 year from diagnosis to  
268 insulin treatment. Misdiagnosis of T2D as T1D is also an unlikely explanation of the positive  
269 correlation as it remains when using clinically defined T1D in the WTCCC with onset <17, insulin



270 treatment from diagnosis for >6 months, and no monogenic diabetes, or when removing obese  
271 individuals from T1D cohorts. Furthermore, we found little evidence for directional consistency  
272 among largest effect T2D variants.

273

274 Reports have argued that islet dysfunction underlies shared etiology of T1D and T2D<sup>12</sup>. Our  
275 findings support a role for shared variants at *GLIS3* in islet function, where risk alleles were  
276 associated with increased fasting glucose level and decreased beta cell function. In addition,  
277 multiple shared risk variants at *GLIS3* had allelic effects on islet enhancer activity and one was  
278 predicted to bind the glucocorticoid receptor, which is involved in diabetes-relevant inflammatory  
279 response<sup>37</sup>. The mechanism of how these variants influence diabetes risk through regulation of  
280 *GLIS3* and/or other genes in islets remains to be uncovered. Putative shared risk signals at  
281 *THADA* were associated with increased glucose level and decreased beta cell function, in line  
282 with a previous report<sup>38</sup>, and variants at *BCL11A* have been reported to affect beta cell function<sup>38</sup>.  
283 Candidate genes at these loci are involved in apoptotic and stress-related processes<sup>39,40</sup> and  
284 therefore altered activity could contribute to a fragile beta cell phenotype. Genome-wide, T1D  
285 and T2D associated variants were enriched in islet regulatory elements and correlated with  
286 increased fasting glucose level. Given the role of islet stress response in shared risk, studies  
287 mapping the islet epigenome and gene expression in diabetogenic stress conditions will help  
288 uncover additional relevant islet regulatory programs.

289

290 Shared variants at the *CTRB1* locus have opposite effects on T2D and T1D risk and have allelic  
291 effects on islet regulatory activity, in line with a previous report correlating risk variants with  
292 *CTRB1/2* expression in pancreas and pancreatic islets<sup>13</sup>. The variant affects a site with apparent  
293 repressive activity in islets. Other loci have evidence for opposite effects on T1D and T2D such  
294 as *TCF7L2*, where T2D risk variants affect islet regulatory activity<sup>7</sup>, *ZZEF1*, and a recently  
295 identified association at *HLA-DRB5*<sup>5</sup>. Heterogeneity in effect direction at specific loci has been  
296 observed in other contexts, for example, between T2D and cardiovascular disease and T2D and  
297 birth weight<sup>5,26</sup>. We further observed enrichment of nominally associated variants with opposite  
298 effects on T1D and T2D in islet regulatory elements, suggesting the potential of a broader  
299 mechanistic role for aspects of pancreatic and islet function in opposed risk of T1D and T2D. The  
300 specific mechanisms, however, of how *CTRB1*, *TCF7L2* and other loci encode opposing risk is  
301 currently unclear and may involve multiple genes and other cell types.

302

303 Another shared mechanism of T1D and T2D pathogenesis is through obesity and insulin  
304 resistance. The ‘accelerator’ hypothesis posits that weight gain and insulin resistance exacerbate  
305 beta cell stress and T1D progression in a manner similar to T2D pathogenesis<sup>11</sup>. We identified  
306 support for this hypothesis through a correlation between increased fasting insulin level and T1D  
307 and T2D risk. We also identified enrichment of T1D and T2D variants for adipose and B cell  
308 regulatory elements, cell types both involved in insulin resistance. We did not find significant  
309 correlation between T1D risk and BMI, or association with large effect obesity loci such as *FTO*.  
310 A recent study identified a causal relationship between childhood obesity and T1D risk, supporting  
311 a role for adolescent growth in T1D pathogenesis<sup>28</sup>, though we did not observe a genome-wide  
312 correlation. There was, however, a positive correlation with male pubertal phenotypes, in line  
313 with increased prevalence of T1D in males in early adulthood<sup>41</sup>, and risk variants at the *CENPW*  
314 locus were associated with male pubertal growth, height and age of menarche<sup>31,32</sup>. This supports  
315 a role for insulin resistance and growth in the shared etiology of T1D and T2D.

316

317 We also observed evidence for correlations with other traits, such as between increased T1D and  
318 T2D risk and decreased birth weight and increased proinsulin level. Previous studies have  
319 reported a correlation between low birth weight and increased T2D risk<sup>26,42</sup>, although the potential  
320 link between birth weight and T1D risk is unclear<sup>43</sup>. Furthermore, variants in endoderm regulatory  
321 sites were enriched for T1D and T2D association, suggesting potential shared effects on  
322 developmental regulatory processes. Proinsulin is an autoantibody in T1D and higher proinsulin  
323 level could contribute to increased risk of developing T1D<sup>44</sup>. Conversely, impaired insulin  
324 processing is observed in beta cell dysfunction and thus could also represent a consequence of  
325 disease progression<sup>45</sup>. Additional studies will be needed to determine causal relationships  
326 between proinsulin level or birth weight and diabetes risk and the direction of these relationships.

327

328 In total, our findings support shared risk involving variants affecting islet function as well as insulin  
329 resistance, growth and development, in the etiology of T1D and T2D. Further studies will help  
330 establish the cellular mechanisms of these effects and their role in diabetes pathogenesis.

331

## 332 **Methods**

333

### 334 **T1D sample collection**

335 For the type 1 diabetes GWAS, we compiled publicly available genotype-level data for case and  
336 control samples from the T1DGC (dbGAP: phs000180.v3.p2), GoKIND/GAIN (dbGAP:

337 phs000018.v2.p1), DCCT-EDIC (dbGAP: phs000086.v3.p1), WTCCC1<sup>46</sup>, and WTCCC2, which  
338 were either genotyped on Affymetrix or Illumina platforms (**Table S1**). Because the GoKIND/GAIN  
339 dataset contained family trios, we extracted only the proband samples. From the WTCCC1  
340 samples, we used the T1D cohort as cases and the 1958 Birth Cohort (58BC), UK National Blood  
341 Service (NBS), and bipolar disorder (BP) cohorts as controls. Unlike a previous study for T1D<sup>47</sup>,  
342 we did not include type 2 diabetes or hypertension from WTCCC1 as controls. From the WTCCC2  
343 samples, we used control cohorts from the UK National Blood Service.

344

### 345 **T1D quality control and imputation**

346 We used the recommended individual and variant exclusion lists where available for 58BC, NBS,  
347 WTCCC1 T1D and BP. We used phenotype files for GoKIND/GAIN and DCCT-EDIC to exclude  
348 samples that were not reported of Caucasian ancestry. We used PLINK<sup>48</sup> ([https://www.cog-  
350 genomics.org/plink2](https://www.cog-<br/>349 genomics.org/plink2)) to perform PCA with 1000 Genomes Project (1KGP) samples to identify and  
351 remove outliers that did not overlap European 1KGP samples on PC1 and PC2. We used PLINK  
352 to calculate identity-by-descent (IBD) values between individuals. Pairs of individuals with at least  
353 second-degree relationships (IBD>.2) were pruned in a manner such that only one related  
354 individual was retained. For the NBS samples that overlapped between Affymetrix and Illumina  
355 platforms, we prioritized the samples genotyped on the Illumina platform. For each cohort, we  
356 filtered out variants with less than 95% call rate, less than 1% minor allele frequency (MAF), and  
357 extreme Hardy-Weinberg equilibrium values ( $P < 1 \times 10^{-5}$ ). We also removed individuals with more  
358 than 5% missing genotypes. We then combined cohorts that were genotyped on similar platforms.  
359 After filtering steps, the total number of individuals available was 15,043, including 8,967 cases  
360 and 6,076 controls (**Table S3**). We imputed 347,083 (Affymetrix) and 500,096 (Illumina)  
361 autosomal variants separately into the HRC panel r1.1 using the Michigan Imputation Server<sup>49</sup>,  
362 resulting in data for 39,117,105 variants. We excluded variants after imputation that had an  
363 imputation quality ( $R^2$ ) less than 0.3, leaving 23,385,104 (Affymetrix) and 25,294,976 (Illumina)  
364 well-imputed variants.

364

### 365 **T1D genome-wide association and meta-analysis**

366 We used the firth bias-corrected logistic likelihood ratio test as implemented in EFACTS  
367 (<https://genome.sph.umich.edu/wiki/EFACTS>) to test variants for association to T1D separately  
368 for Affymetrix and Illumina combined cohorts. We used PLINK to LD prune genotyped variants to  
369 create a set of independent variants. We then used PLINK to perform principal component  
370 analysis (PCA) and extracted the top 3 principal components (PCs). We used sex and the top 3

371 PCs as covariates, set a lower MAF threshold of 0.005, and used genotype dosages for  
372 association testing. For triallelic SNPs and cases where multiple variants mapped to the same  
373 genomic coordinates, we kept the variant with the highest MAF. We then used inverse-variance  
374 meta-analysis as implemented in METAL<sup>50</sup> on association results for 8,720,060 (Affymetrix) and  
375 8,778,018 (Illumina) variants, keeping variants that were tested on both platforms. We further  
376 removed genotyped variants that had an empirical  $R^2$  ( $ER^2 < .8$ ) for either cohort and all variants  
377 in at least moderate LD ( $r^2 > .5$ ) with these variants. A total of 8,491,085 variants remained for  
378 downstream analyses.

379

380 To address the potential for misdiagnosed T2D cases in the T1D GWAS, we used phenotype  
381 data to remove 278 T1D cases with body-mass index (BMI) > 30 from the DCCT and  
382 GoKIND/GAIN cohorts. We then re-ran the GWAS meta-analyses using the above methods.

383

#### 384 **WTCCC genome-wide association**

385 We collected genotype data for a case cohort of T2D, and control cohorts from NBS and 58BC  
386 from the WTCCC1 study<sup>46</sup>. We used sample exclusion lists to remove duplicate, related, or non-  
387 Caucasian ancestry samples and SNP exclusion lists to remove poorly genotyped variants. Prior  
388 to imputation, we also filtered out variants with less than 95% call rate, less than 1% MAF, and  
389 extreme Hardy-Weinberg equilibrium values ( $P < 1e^{-5}$ ). We imputed 412,388 genotyped variants  
390 from 1,924 T2D case samples and 2,939 control samples together into the HRC panel r1.1 using  
391 the Michigan imputation server. After excluding variants with  $R^2 < 0.3$ , we retained 22,520,888  
392 well-imputed variants. We filtered out artifacts by excluding genotyped variants with  $ER^2 < 0.8$  and  
393 all variants in at least moderate LD ( $r^2 > .5$ ) with these variants. We used the firth bias-corrected  
394 logistic likelihood ratio test as implemented in EFACTS to test variants with MAF > 0.005 for  
395 association, using the top 3 PCs as covariates. We finally extracted summary statistics for  
396 1,173,418 variants in common with the pre-computed European LD score reference panel.

397

#### 398 **Genetic enrichment analyses**

399 We tested for enrichment of nominal association and concordance in effects among known T1D  
400 and T2D risk loci.

401

402 For T2D loci, we collected published credible sets of 49 signals on the MetaboChip<sup>19</sup>, 41 additional  
403 signals in GoT2D,<sup>8</sup> and 17 additional signals in DIAGRAM 1000G<sup>4</sup>. We removed all secondary  
404 association signals to retain only the primary signal at each locus. For the 93 resulting primary

405 association signals, we then obtained the variant with the highest posterior probability. Where the  
406 most likely causal variant was not present in T1D association data, we used the next most likely  
407 causal variant. For each variant, we obtained the p-value for T1D association and direction of T1D  
408 effect for the T2D risk allele. We tested for enrichment of variants with nominal association ( $P < .05$ )  
409 by comparing to the expected percentage obtained from sets of matched variants from SNPsnap<sup>51</sup>  
410 using a binomial test.

411  
412 We then determined concordance in T1D effect direction on T2D variants by calculating the  
413 number of variants with same effect direction and applying a binomial test. We further determined  
414 the concordance in effect direction in T1D association data in the UK Biobank (ICD10 code E10  
415 from <https://sites.google.com/broadinstitute.org/ukbbgwasresults/home>) using a binomial test.

416  
417 For T1D loci, we obtained the variant with the highest posterior probability in fine-mapping of 57  
418 loci described the sections below. Where the top variant was not present in T2D association data  
419 we used the next most probable variant. For each variant, we obtained the p-value for T2D  
420 association and direction of T2D effect for the T1D risk allele. We tested for enrichment of nominal  
421 association ( $P < .05$ ) by comparing to the expected percentage obtained from sets of matched  
422 variants from SNPsnap<sup>51</sup> using a binomial test.

423  
424 We then determined concordance in T2D effect direction on T1D variants by calculating the  
425 number of variants with same effect direction and applying a binomial test.

426  
427 **Genetic correlation analyses**

428 We tested for genetic correlation between T1D and T2D, and related glycemetic and anthropometric  
429 traits, using LD score regression<sup>16,52</sup>.

430  
431 We collected quantitative trait data for fasting insulin level, fasting glucose level, HOMA-B, HOMA-  
432 IR, HbA1C, and proinsulin level from the MAGIC consortium<sup>27,30,53</sup>, body-mass index (BMI) from  
433 the GIANT consortium<sup>54</sup>, and pubertal height (12M, 10F), birth weight and childhood obesity from  
434 the EGG consortium<sup>26,55</sup>. For the UK Biobank, we obtained summary statistic data of 337k  
435 samples using T1D and T2D phenotypes defined from ICD10 codes E10 (T1D) and E11 (T2D)  
436 available at [sites.google.com/broadinstitute.org/ukbbgwasresults/home](https://sites.google.com/broadinstitute.org/ukbbgwasresults/home). For T2D we obtained  
437 data from the GoT2D, HapMap2, and trans-ethnic GWAS studies from the DIAGRAM consortium  
438 website.

439

440 For each trait, we formatted summary statistics to retain only variants in HapMap3 and correctly  
441 orient variant alleles. We then ran LD score regression on the resulting formatted files using  
442 default LD scores.

443

#### 444 **Genomic enrichment analyses**

445 We considered active enhancer and promoter site annotations for 98 cell types from the  
446 Epigenome Roadmap project<sup>21</sup>, along with annotations for coding exons from GENCODE<sup>29</sup>. We  
447 used stratified LD-score regression<sup>17</sup> to identify annotations that were enriched for signal in T1D  
448 and T2D association data. Stratified LD-score regression is a multiple regression, where the chi-  
449 squared statistics for a trait are regressed on LD-scores computed using variants from each of a  
450 set of functional annotations, and the estimated parameters quantify the relative contribution of  
451 each annotation to the total heritability.

452

453 For the five cell-types with positive enrichment for both T1D and T2D association (pancreatic  
454 islets, pancreas, adipose, CD19+ B cells, and CD184+ endoderm), we tested whether these  
455 annotations were enriched in variants with shared or opposite effects on T1D and T2D. We  
456 identified variants with  $P < .05$  for both T1D and T2D association and in 1000 Genomes phase 3  
457 data. For each of these variants  $i$ , we computed  $z_{i,T1D} = \beta_{i,T1D} / SE_{i,T1D}$  and  $z_{i,T2D} = \beta_{i,T2D} / SE_{i,T2D}$ .  
458 We sorted them by the value of  $|z_{i,T1D} + z_{i,T2D}|$  for LD-pruning purposes. After sorting, we pruned  
459 these variants using the SNPclip tool of LDlink<sup>54</sup> using EUR populations, a  $R^2 > 0.1$  and  $MAF > 0.01$ ,  
460 resulting in 3856 and 2254 independent shared and opposite variants, respectively. We then  
461 generated sets of randomized, matched SNPs using SNPsnap<sup>55</sup>. We tested shared and opposite  
462 variants for enriched overlap compared to the average overlap across matched variant sets using  
463 a one-sided Fisher exact test.

464

#### 465 **Fine-mapping of causal variant sets**

466 We used effect and standard error estimates to calculate a Bayes Factor<sup>56</sup> for each variant. We  
467 obtained 58 known loci for T1D from Immunobase and excluded the MHC locus (**Table S2**). We  
468 extracted the previously reported index variants and used PLINK to calculate  $r^2$  values between  
469 57 index variants and all common variants ( $MAF > .5$ ) within a 5 MB window as done in a previous  
470 study<sup>8</sup>. We defined credible sets of variants for each locus as variants with  $r^2 > .1$  with the index  
471 variant. For each locus, we calculated the posterior probability of association (PPA) for each  
472 variant by dividing the Bayes Factor for each variant by the sum of Bayes Factors for the entire

473 locus. We then calculated the 99% credible set by taking the set of variants for each locus that  
474 added up to 99% PPA. We compared our T1D credible sets to previously published ImmunoChip  
475 credible sets<sup>3</sup> by extracting 34 common loci between both studies. From the ImmunoChip study,  
476 we extracted only the primary signals. To directly compare p-values, we filtered for variants  
477 covered by both studies with non-missing p-values and calculated the Pearson correlation. To  
478 identify high probability variants not in ImmunoChip credible sets, we extracted variants from the  
479 34 loci that were not in the ImmunoChip primary signal credible set and sorted by PPA.

480

### 481 **Genomic annotations at fine-mapped signals**

482 We considered active regulatory site annotations for cell-types enriched for T1D/T2D association  
483 along with annotations for coding exons and UTR regions from GENCODE<sup>29</sup>. For T1D we used  
484 fine-mapping data from 57 signals as described above. For T2D we used published fine-mapping  
485 data for 93 primary signals from MetaboChip, GoT2D and DIAGRAM 1000G studies. At each  
486 signal, we calculated a cumulative posterior causal probability (PPA) for each annotation as the  
487 sum of PPA values for variants overlapping that annotation. We then assigned T1D/T2D signals  
488 to groups based on the highest cumulative PPA value across annotations, considering signals  
489 with a cumulative PPA value less than .1 for all annotations as 'un-annotated'. For each T1D  
490 group we then calculated the median association of signals in the group with T2D, and for each  
491 T2D group we calculated the median association with T1D.

492

### 493 **Risk signal co-localization**

494 We used a Bayesian co-localization method to determine loci at which T1D and T2D association  
495 data showed evidence of a causal variant shared by both traits<sup>57</sup>. At a given locus, the method  
496 takes as inputs Bayes Factors of association from two datasets and a specification of the prior  
497 probability that each is causal for one or both traits. From these a posterior probability (PP) is  
498 computed for each of five hypotheses:

499

500 H0: The locus contains no variant causal for either trait

501 H1: The locus contains a variant causal for trait 1 but none causal for trait 2

502 H2: The locus contains a variant causal for trait 2 but none for trait 1

503 H3: The locus contains a variant causal for trait 1 and an independent variant causal for trait 2

504 H4: The locus contains a variant causal for both H1 and H2.

505

506 We used the default prior assumption that all variants at a locus are equally likely to be causal.  
507 This model has two important limitations: It assumes each locus has at most one causal variant,  
508 and the distinction between H3 and H4 may be confounded by cases of high LD. We considered  
509 the prior probability that a variant is associated with T1D or T2D as  $1 \times 10^{-4}$  and the prior probability  
510 that a variant is associated with both traits as  $1 \times 10^{-5}$ .

511  
512 We collected 93 T2D loci and 56 T1D loci, of which five have overlapping coordinates (*CENPW*,  
513 *GLIS3*, *RASGRP1*, *CTRB1*, *MTMR3*), for a total of 144 loci (**Supplemental Table 3**). At each  
514 locus, we obtained a reported index variant and then extracted all variants in a 500kb window.  
515 For each variant, we calculated a Bayes Factor for T1D and T2D separately using the approach  
516 of Wakefield<sup>56</sup>. We then applied the co-localization test to compare T1D and T2D Bayes Factors,  
517 and considered loci with  $H_4 > .50$  as shared. For loci with evidence for a shared risk variant, we  
518 then fine-mapped variants causal for the shared signal. For each locus, we multiplied T1D and  
519 T2D Bayes Factors at each variant, and then calculated the posterior causal probability (PPA) as  
520 the Bayes Factor divided by the sum of all variant Bayes Factors across the locus. We further  
521 calculated a cumulative PPA (cPPA) as the sum of PPA values for variants overlapping an  
522 annotation at a given locus.

523  
524 To validate loci with evidence for a shared causal variant we further applied eCAVIAR, a co-  
525 localization method capable of modeling multiple causal variants<sup>58</sup>. For each locus, we chose a  
526 window of 100 variants on either side of the variant with the strongest combined T1D and T2D  
527 evidence. We provided Z-scores of T1D and T2D association together with pairwise LD statistics  
528 of European samples in 1000 Genomes Project v3 data for all variants within the window to  
529 eCAVIAR using default settings. For each variant in the window, eCAVIAR computed a co-  
530 localization posterior probability (CLPP), the probability that the variant is causal for the local  
531 signal in both traits. We considered loci to be co-localized using this approach with at least one  
532 variant with  $CLPP > 0.01$  as recommended in the original study.

533  
534 For quantitative trait association at shared risk variants, we obtained the most likely causal variant  
535 from combined T1D and T2D evidence. We extracted summary statistics for each trait and  
536 calculated a signed Z-score for the risk allele using effect size and standard error estimates.

537

538 **Islet ATAC-seq and chromatin states**



539 We utilized ATAC-seq data generated from four primary pancreatic islet samples as described in  
540 a separate study<sup>59</sup>. For each sample, we trimmed adaptor sequences from the reads with  
541 trim\_galore (<https://github.com/FelixKrueger/TrimGalore>). The resulting sequences were aligned  
542 to sex-specific hg19 reference genomes using bwa mem<sup>60</sup>. We filtered reads to retain those in  
543 proper pairs and with mapping quality score greater than 30. We then removed duplicate and  
544 non-autosomal reads. We called sites individually for each sample with MACS2<sup>61</sup> at a q-value  
545 threshold of .05 with the following options “—no-model”, “—shift -100”, “—extsize 200”. We  
546 removed sites that overlapped genomic regions blacklisted by the ENCODE consortium<sup>20</sup>. We  
547 merged sites from these 4 samples and two previously generated in islets<sup>33</sup> with bedtools<sup>62</sup> to  
548 obtain a comprehensive set of ATAC-seq peaks in human islets.

549

550 We used islet chromatin states described separately<sup>34</sup>. In brief, we used previously published  
551 data<sup>6,35</sup> from ChIP-seq assays generated in islets and for which there was matching input  
552 sequence from the same sample. For each assay and input, we aligned reads to the human  
553 genome hg19 using bwa samse and bwa aln<sup>60</sup> with a flag to trim reads at a quality threshold of  
554 less than 15. We converted the alignments to bam format and sorted the bam files. We then  
555 removed duplicate reads, and further filtered reads that had a mapping quality score below 30.  
556 Sequence data from the same assay in the same sample were then pooled. We defined  
557 chromatin states from ChIP-seq data using ChromHMM<sup>63</sup> with a 9 state model. We assigned the  
558 resulting states names based on the resulting patterns.

559

### 560 **ATAC-seq footprint analysis**

561 To identify haplotype-aware motifs within ATAC-seq footprints overlapping accessible chromatin  
562 sites, we searched accessible chromatin sites from four ATAC-seq samples for instances of motifs  
563 from JASPAR, SELEX, ENCODE and *de novo* motifs identified in our data<sup>64</sup>. We used  
564 vcf2diploid<sup>65</sup> (<https://github.com/abyzovlab/vcf2diploid>) to create individual-specific diploid  
565 genomes by mapping our phased, imputed genotypes onto hg19 using only SNPs and ignoring  
566 indels. Then, we used fimo<sup>66</sup> to scan the personalized genomes for our compiled database of  
567 motifs, limiting the sequences scanned to those derived from islet accessible chromatin. For fimo,  
568 we used the default parameters for p-value threshold ( $1 \times 10^{-4}$ ) and a background GC content of  
569 40.9% based on hg19.

570

571 CENTIPEDE<sup>67</sup> was used to discover footprint sites for each motif, using the discovered motif  
572 instances within ATAC-seq peaks. For each motif, we used the make\_cut\_matrix utility from

573 atack (<https://github.com/ParkerLab/atactk>) to calculate a cut-site matrix that contained counts of  
574 the number of Tn5 integrations within a window defined by  $\pm 100$  bp from each motif occurrence  
575 for both forward and reverse strands. This cut-site matrix was provided as input to CENTIPEDE  
576 along with regions for each motif occurrence to model the posterior probability that a given motif  
577 occurrence was bound by a TF. We defined footprints for a given motif as regions that had a  
578 posterior probability  $\geq 0.99$ . We combined footprints from our samples with a previously published  
579 set of footprints in pancreatic islets<sup>33</sup>.

580

581 We further identified variants predicted to disrupt each footprint<sup>4</sup>. We calculated the entropy score  
582 for a variant position in a footprint using the position frequency matrix for each motif. For each  
583 base at a given position bp and the frequency of the base at that position f, we calculated the  
584 entropy as:

$$585 \quad \text{Entropy} = \sum_{bp} f(bp) \times \log_2 f(bp).$$

586

587 A footprint was considered disrupted if a variant fell in a conserved position in the motif  
588 (Entropy < 1.0).

589

### 590 **Luciferase reporter assays**

591 To test for allelic differences in enhancer activity at rs4237150, rs10116772 and rs8056814, we  
592 cloned sequences containing the alt or ref allele in forward and reverse orientation upstream of  
593 the minimal promoter of firefly luciferase vector pGL4.23 (Promega) using KpnI and SacI  
594 restriction sites.

595

596 Primer sequences were:

597 rs4237150

598 Fwd: TTACGCGGTACCACACACTTCTGTAAATCAGGTCAG, TCATAGGAGCTCGAAGCAGTTTGTGGCTGGC

599 Rev: TTACGCGAGCTCACACACTTCTGTAAATCAGGTCAG, TCATAGGGTACCGAAGCAGTTTGTGGCTGGC

600 rs6476839

601 Fwd: GTCGGTACCTCGCAATTCAATCAAGGACA, GCTGAGCTCCAGGCACATGTTTGCACTTT

602 Rev: GTCGAGTCGTCGCAATTCAATCAAGGACA, GCTGGTACCCAGGCACATGTTTGCACTTT

603 rs10116772+rs10814915

604 Fwd: GTCGGTACCTTCATTAATGCCGCCTTTTC, GCTGAGCTCTGAATTGCGAAATGTGCTTC

605 Rev: GTCGAGTCGTTTCATTAATGCCGCCTTTTC, GCTGGTACCTGAATTGCGAAATGTGCTTC

606 rs8056814

607 Fwd: TAAGCAGGTACCTGGGTGACAGAGTGAGACTCC, TGCTTAGAGCTCGGTGTTTCCGCCTAACACTG

608 Rev:TAAGCAGAGCTCTGGGTGACAGAGTGAGACTCC,TGCTTAGGTACCGGTGTTTCCGCCTAACACTG

609

610 MIN6 beta cells were seeded into 6 (or 12)-well trays at 1 million cells per well. At 80% confluency,  
611 cells were co-transfected with 400ng of the experimental firefly luciferase vector pGL4.23  
612 containing the alt or ref allele in either orientation or an empty vector and 50ng of the vector pRL-  
613 SV40 (Promega) using the Lipofectamine 3000 reagent. All transfections were done in triplicate.  
614 Cells were lysed 48 hours after transfection and assayed for Firefly and Renilla luciferase  
615 activities using the Dual-Luciferase Reporter system (Promega). Firefly activity was normalized  
616 to Renilla activity and compared to the empty vector and normalized results were expressed as  
617 fold change compared to empty vector control per allele. A two-sided t-test was used to compare  
618 the luciferase activity between the two alleles in each orientation.

619

### 620 **Allelic imbalance analysis**

621 We collected ChIP-seq data from assays in primary islet cells from multiple sources<sup>6,35,68–71</sup>. We  
622 aligned sequence data using bwa samse<sup>60</sup>, filtered out mitochondrial reads, and removed  
623 duplicates using Picard software. For each sample we applied QuASAR<sup>72</sup> to obtain estimated  
624 genotypes. A total of 6 samples were determined to be heterozygous at rs4237150 with probability  
625 of being homozygous  $< 10^{-4}$ . For these samples we also inferred heterozygosity at rs10116772,  
626 due to high linkage and by imputation into 1000 Genomes v3 variants via the Michigan Imputation  
627 Server<sup>49</sup>. Across these 6 samples, a total of 8 datasets had more than 5 reads overlapping  
628 rs4237150 – FOXA2 (1), H3K27ac (3), PDX1 (2), NKX6-1 (2). We applied WASP<sup>73</sup> to each  
629 dataset to correct for reference mapping bias. We then pooled read counts for risk and protective  
630 alleles at rs4237150 and rs10116772 and applied a two-sided binomial test for allelic imbalance.

631

### 632 **Author Contributions**

633 K.J.G. designed the study; K.J.G, A.J.A. and J.C. wrote the manuscript and performed genetic  
634 and genomic analyses; M.O. and N.K. performed experiments and contributed to analyses.

635

### 636 **Acknowledgements**

637 This work in this manuscript supported in part by NIH/NIDDK award DK112155 and ADA award  
638 1-17-JDF-027 to KJG. GoKinD: The Genetics of Kidneys in Diabetes (GoKinD) Study was  
639 conducted by the GoKinD Investigators and supported by the Juvenile Diabetes Research

640 Foundation, the CDC, and the Special Statutory Funding Program for Type 1 Diabetes Research  
641 administered by the National Institute of Diabetes and Digestive and Kidney Diseases (NIDDK).  
642 The data from the GoKinD study were supplied by the NIDDK Central Repositories. DCCT/EDIC:  
643 The Diabetes Control and Complications Trial (DCCT) and its follow-up the Epidemiology of  
644 Diabetes Interventions and Complications (EDIC) study were conducted by the DCCT/EDIC  
645 Research Group and supported by National Institute of Health grants and contracts and by the  
646 General Clinical Research Center Program, NCR. The data from the DCCT/EDIC study were  
647 supplied by the NIDDK Central Repositories. T1DGC: This research utilizes resources provided  
648 by the Type 1 Diabetes Genetics Consortium (T1DGC), a collaborative clinical study sponsored  
649 by the National Institute of Diabetes and Digestive and Kidney Diseases (NIDDK), National  
650 Institute of Allergy and Infectious Diseases (NIAID), National Human Genome Research Institute  
651 (NHGRI), National Institute of Child Health and Human Development (NICHD), and the Juvenile  
652 Diabetes Research Foundation International (JDRF) and supported by U01 DK062418. The UK  
653 case series collection was additionally funded by the JDRF and Wellcome Trust and the National  
654 Institute for Health Research Cambridge Biomedical Centre, at the Cambridge Institute for  
655 Medical Research, UK (CIMR), which is in receipt of a Wellcome Trust Strategic Award (079895).  
656 The data from the T1DGC study were supplied by the NIDDK Central Repositories. WTCCC: This  
657 study makes use of data generated by the Wellcome Trust Case Control Consortium. A full list of  
658 the investigators who contributed to the generation of the data is available from  
659 [www.wtccc.org.uk](http://www.wtccc.org.uk). Funding for the project was provided by the Wellcome Trust under award  
660 076113. This manuscript was not prepared in collaboration with investigators of these studies  
661 and does not necessarily reflect the opinions or views of the WTCCC, GoKinD, DCCT/EDIC or  
662 T1DGC studies or study groups, the NIDDK Central Repositories, the NIH, or the study sponsors.

663

664

## 665 Data availability

666 Summary data will be available at [http://www.gaultonlab.org/pages/Aylward\\_T1D\\_T2D](http://www.gaultonlab.org/pages/Aylward_T1D_T2D)

667

668

669

670

671

672

673

674 **Figure legends**

675

676 **Main Figures**

677

678 **Figure 1. Shared effects of genetic variants on T1D and T2D risk.** (A) Known T2D risk  
679 variants are significantly enriched for nominal T1D association ( $P < .05$ ), whereas known T1D risk  
680 variants do not show evidence for enrichment of nominal T2D association.  $**P < .001$  (B) Known  
681 T2D risk variants with nominal T1D association have concordant direction of effect on T1D risk  
682 (14/18, red=known T1D locus;  $**$ index variant T1D  $P < 5 \times 10^{-4}$ ). Values are T1D effect size and  
683 SE. (C) Variants genome-wide have correlated effects on T1D and T2D risk using multiple  
684 datasets for each disease (UKBB – UK Biobank, WTCCC – Wellcome Trust Case Control  
685 Consortium, T2D TE – Mahajan et al, T2D HM2 – Morris et al 2012, T2D GoT2D – Fuchsberger  
686 et al 2016, T1D BMI<30 – T1D association data removing obese case samples). Values are  
687 heritability estimates and SE.

688

689 **Figure 2. Mechanisms of variant effects on T1D and T2D risk.** (A) Increased T1D risk (left)  
690 is correlated with increased fasting insulin level and proinsulin level ( $*P < .05$ ), in addition to  
691 increased male pubertal growth and fasting glucose level, and decreased birth weight; Increased  
692 T2D risk (right) is correlated with increased HbA1C, fasting glucose, fasting insulin, HOMA-IR,  
693 BMI and childhood obesity, and decreased birth weight ( $**P < 1 \times 10^{-4}$ ). Values are heritability  
694 estimates and SE. (C) Variants with same direction of effect on T1D and T2D risk have stronger  
695 correlation with increased fasting insulin, glucose and proinsulin level, and decreased birth weight.  
696 ( $**P < 1 \times 10^{-4}$ ,  $*P < .05$ ). Values are heritability estimates and SE. (D) Variants with T1D and T2D  
697 association are enriched for pancreatic islet, adipose, CD19+ B cell, and CD184+ endoderm  
698 regulatory sites. (blue = pancreatic, green = immune). (E) Variants with both nominal association  
699 ( $P < .05$ ) and shared direction of effect on T1D and T2D risk are significantly enriched in endoderm,  
700 islet and adipose regulatory sites. ( $*P < .05$ ). Values are percent overlap and CI.

701

702 **Figure 3. Fine-mapping and functional annotation of known T1D loci.** (A) Fine-mapping of  
703 causal variant sets at 57 known T1D risk signals. (left) number of 99% credible set variants at  
704 each locus and (right) causal probabilities (PPA) of credible set variants at each locus. (B)  
705 Cumulative PPA values of 57 T1D signals in cell-type regulatory site and coding annotations.  
706 T1D signals mapped into four primary groups including immune cell regulatory sites (31 signals),  
707 pancreas regulatory sites (6 signals), and coding exons (4 signals). (C) T1D signals within

708 different groups had distinct patterns of association with T2D, where T1D pancreas signals had  
709 the strongest evidence for T2D association.

710

711 **Figure 4. Shared T1D and T2D risk variants affect islet regulatory activity.** (A) Five loci have  
712 evidence for a shared signal ( $P_{\text{shared}} > .50$ ) influencing both T1D and T2D risk, and two have  
713 evidence for distinct signals ( $P_{\text{distinct}} > .50$ ) (dark grey =  $P_{\text{shared}}$ , grey =  $P_{\text{distinct}}$ ) (C) Number of 99%  
714 credible set variants at shared T1D and T2D risk loci. After combining T1D and T2D evidence  
715 the *GLIS3* and *CTRB1* signals have <10 variants. (C) Quantitative trait association at shared T1D  
716 and T2D signals. Values represent signed z-scores for the risk allele of the most likely causal  
717 variant (blue = positive, red = negative). For *CTRB1* z-scores are signed to the T2D risk allele.  
718 (D) Shared risk variants rs4237150, rs10116772, and rs10814915 at *GLIS3* are in islet active  
719 enhancer and accessible chromatin, and rs4237150 is also in islet TF ChIP-seq (states: dark blue  
720 = active enhancer, light blue = weak enhancer, red = active promoter) (E) Variants at *GLIS3* have  
721 allelic effects on enhancer activity in islet cells. Values are mean and SD. (N=3; \*P<.05, \*\* P<.01).

722

## 723 **Supplemental Figures**

724

725 **Supplemental Figure 1. Genome-wide association study of T1D case and control samples.**

726 (A) Principal component plots showing the ancestry of samples genotyped on Affymetrix and  
727 Illumina arrays as compared to the super populations of the 1000 Genomes Project after QC  
728 measures. EUR = European, AFR = African, AMR = Americas, EAS = East Asian, and SAS =  
729 South Asian. (B) Manhattan plot plotting chromosomal positions (hg19) and the negative log<sub>10</sub>-  
730 P-values, with known T1D loci highlighted in red.

731

732 **Supplemental Figure 2. Genomic annotations and T1D association and fine-mapped T2D**

733 **loci.** (A) Cumulative PPA values of 93 primary T2D signals in cell-type regulatory site and coding  
734 annotations. T2D signals mapped into six groups including pancreatic regulatory sites (21  
735 signals), adipose regulatory sites (15 signals), and coding exons (4 signals) in addition to un-  
736 annotated signals. (B) T2D signals within different groups had distinct patterns of association  
737 with T1D, where T2D pancreas signals had the strongest T1D association.

738

739 **Supplemental Figure 3. Shared T1D and T2D signals at the *GLIS3* and *CTRB1* loci.** (top)

740 P-values of variant associations with T1D (red) and T2D (blue) at the *GLIS3* and *CTRB1* loci.

741 Causal probability of variants at the shared *GLIS3* and *CTRB1* signals by (middle) combining T1D

742 and T2D evidence in Bayesian fine-mapping, and (bottom) modeling shared causal variants using  
743 eCAVIAR. Variants at each signal have high causal probabilities in both analyses.

744

745 **Supplemental Figure 4. Allelic imbalance in islet regulatory activity at *GLIS3*.** Read counts  
746 in samples heterozygote for rs4237150 and rs10116772 in pancreatic islet FOXA1, NKX6.1,  
747 PDX1 and H3K27ac ChIP-seq assays (risk allele counts = light grey, protective allele = dark grey).  
748 The risk allele had increased read counts in all assays. P-values for binomial tests are listed  
749 below each assay.

750

751 **Supplemental Figure 5. Shared variant at *CTRB1* affects islet regulatory activity.** (A) Plot  
752 of candidate causal variants at the shared *CTRB1* signal. Variant rs8056814 has a high  
753 probability (PPA=.90) of being causal for T1D and T2D risk, and maps in an islet accessible  
754 chromatin site and an islet active enhancer upstream of *CTRB1*. (B) Luciferase reporter assay of  
755 sequence surrounding rs8056814 alleles in the islet cell line MIN6. All constructs had reduced  
756 activity compared to the empty vector. The T2D risk allele of rs8056814 has increased activity  
757 compared to the T2D protective allele. Values are fold change and SD. (N=3; \*P<.05, \*\*P<.001).

758 Citations

759

760 1. Mathers, C. D. & Loncar, D. Projections of global mortality and burden of disease from 2002

761 to 2030. *PLoS Med.* **3**, e442 (2006).

762 2. Atkinson, M. A. The Pathogenesis and Natural History of Type 1 Diabetes. *Cold Spring*

763 *Harb. Perspect. Med.* **2**, (2012).

764 3. Onengut-Gumuscu, S. *et al.* Fine mapping of type 1 diabetes susceptibility loci and

765 evidence for colocalization of causal variants with lymphoid gene enhancers. *Nat. Genet.*

766 **47**, 381–386 (2015).

767 4. Scott, R. A. *et al.* An Expanded Genome-Wide Association Study of Type 2 Diabetes in

768 Europeans. *Diabetes* (2017). doi:10.2337/db16-1253

769 5. Zhao, W. *et al.* Identification of new susceptibility loci for type 2 diabetes and shared

770 etiological pathways with coronary heart disease. *Nat. Genet.* **advance online publication**,

771 (2017).

772 6. Pasquali, L. *et al.* Pancreatic islet enhancer clusters enriched in type 2 diabetes risk-

773 associated variants. *Nat. Genet.* **46**, 136–143 (2014).

774 7. Gaulton, K. J. *et al.* A map of open chromatin in human pancreatic islets. *Nat. Genet.* **42**,

775 255–259 (2010).

776 8. Fuchsberger, C. *et al.* The genetic architecture of type 2 diabetes. *Nature* **536**, 41–47

777 (2016).

778 9. Claussnitzer, M. *et al.* Leveraging cross-species transcription factor binding site patterns:

779 from diabetes risk loci to disease mechanisms. *Cell* **156**, 343–358 (2014).

780 10. Claussnitzer, M. *et al.* FTO Obesity Variant Circuitry and Adipocyte Browning in Humans. *N.*

781 *Engl. J. Med.* **373**, 895–907 (2015).

782 11. Wilkin, T. J. The accelerator hypothesis: weight gain as the missing link between Type I and

783 Type II diabetes. *Diabetologia* **44**, 914–922 (2001).



- 784 12. Dooley, J. *et al.* Genetic predisposition for beta cell fragility underlies type 1 and type 2  
785 diabetes. *Nat. Genet.* **48**, 519–527 (2016).
- 786 13. 't Hart, L. M. *et al.* The CTRB1/2 locus affects diabetes susceptibility and treatment via the  
787 incretin pathway. *Diabetes* **62**, 3275–3281 (2013).
- 788 14. Senée, V. *et al.* Mutations in GLIS3 are responsible for a rare syndrome with neonatal  
789 diabetes mellitus and congenital hypothyroidism. *Nat. Genet.* **38**, 682–687 (2006).
- 790 15. Liston, A., Todd, J. A. & Lagou, V. Beta-Cell Fragility As a Common Underlying Risk Factor  
791 in Type 1 and Type 2 Diabetes. *Trends Mol. Med.* **23**, 181–194 (2017).
- 792 16. Bulik-Sullivan, B. K. *et al.* LD Score regression distinguishes confounding from polygenicity  
793 in genome-wide association studies. *Nat. Genet.* **47**, 291–295 (2015).
- 794 17. Finucane, H. K. *et al.* Partitioning heritability by functional annotation using genome-wide  
795 association summary statistics. *Nat. Genet.* **47**, 1228–1235 (2015).
- 796 18. Pasaniuc, B. & Price, A. L. Dissecting the genetics of complex traits using summary  
797 association statistics. *Nat. Rev. Genet.* **18**, 117–127 (2017).
- 798 19. Gaulton, K. J. *et al.* Genetic fine mapping and genomic annotation defines causal  
799 mechanisms at type 2 diabetes susceptibility loci. *Nat. Genet.* **47**, 1415–1425 (2015).
- 800 20. ENCODE Project Consortium. An integrated encyclopedia of DNA elements in the human  
801 genome. *Nature* **489**, 57–74 (2012).
- 802 21. Roadmap Epigenomics Consortium *et al.* Integrative analysis of 111 reference human  
803 epigenomes. *Nature* **518**, 317–330 (2015).
- 804 22. Mikkelsen, T. S. *et al.* Comparative epigenomic analysis of murine and human  
805 adipogenesis. *Cell* **143**, 156–169 (2010).
- 806 23. McCarthy, S. *et al.* A reference panel of 64,976 haplotypes for genotype imputation. *Nat.*  
807 *Genet.* **48**, 1279–1283 (2016).

- 808 24. Manning, A. K. *et al.* A genome-wide approach accounting for body mass index identifies  
809 genetic variants influencing fasting glyceic traits and insulin resistance. *Nat. Genet.* **44**,  
810 659–669 (2012).
- 811 25. Locke, A. E. *et al.* Genetic studies of body mass index yield new insights for obesity biology.  
812 *Nature* **518**, 197–206 (2015).
- 813 26. Horikoshi, M. *et al.* Genome-wide associations for birth weight and correlations with adult  
814 disease. *Nature* **538**, 248–252 (2016).
- 815 27. Strawbridge, R. J. *et al.* Genome-wide association identifies nine common variants  
816 associated with fasting proinsulin levels and provides new insights into the pathophysiology  
817 of type 2 diabetes. *Diabetes* **60**, 2624–2634 (2011).
- 818 28. Censin, J. C. *et al.* Childhood adiposity and risk of type 1 diabetes: A Mendelian  
819 randomization study. *PLOS Med.* **14**, e1002362 (2017).
- 820 29. Harrow, J. *et al.* GENCODE: the reference human genome annotation for The ENCODE  
821 Project. *Genome Res.* **22**, 1760–1774 (2012).
- 822 30. Dupuis, J. *et al.* New genetic loci implicated in fasting glucose homeostasis and their impact  
823 on type 2 diabetes risk. *Nat. Genet.* **42**, 105–116 (2010).
- 824 31. Wood, A. R. *et al.* Defining the role of common variation in the genomic and biological  
825 architecture of adult human height. *Nat. Genet.* **46**, 1173–1186 (2014).
- 826 32. Day, F. R. *et al.* Genomic analyses identify hundreds of variants associated with age at  
827 menarche and support a role for puberty timing in cancer risk. *Nat. Genet.* **49**, 834–841  
828 (2017).
- 829 33. Varshney, A. *et al.* Genetic regulatory signatures underlying islet gene expression and type  
830 2 diabetes. *Proc. Natl. Acad. Sci. U. S. A.* **114**, 2301–2306 (2017).
- 831 34. Greenwald, W. W. *et al.* Pancreatic islet chromatin accessibility and conformation defines  
832 distal enhancer networks of type 2 diabetes risk. *bioRxiv* 299388 (2018).  
833 doi:10.1101/299388

- 834 35. Parker, S. C. J. *et al.* Chromatin stretch enhancer states drive cell-specific gene regulation  
835 and harbor human disease risk variants. *Proc. Natl. Acad. Sci. U. S. A.* **110**, 17921–17926  
836 (2013).
- 837 36. Thomas, N. J. *et al.* Frequency and phenotype of type 1 diabetes in the first six decades of  
838 life: a cross-sectional, genetically stratified survival analysis from UK Biobank. *Lancet*  
839 *Diabetes Endocrinol.* (2017). doi:10.1016/S2213-8587(17)30362-5
- 840 37. Barnes, P. J. Anti-inflammatory actions of glucocorticoids: molecular mechanisms. *Clin. Sci.*  
841 *Lond. Engl.* 1979 **94**, 557–572 (1998).
- 842 38. Simonis-Bik, A. M. *et al.* Gene variants in the novel type 2 diabetes loci CDC123/CAMK1D,  
843 THADA, ADAMTS9, BCL11A, and MTNR1B affect different aspects of pancreatic beta-cell  
844 function. *Diabetes* **59**, 293–301 (2010).
- 845 39. Nogueira, T. C. *et al.* GLIS3, a susceptibility gene for type 1 and type 2 diabetes, modulates  
846 pancreatic beta cell apoptosis via regulation of a splice variant of the BH3-only protein Bim.  
847 *PLoS Genet.* **9**, e1003532 (2013).
- 848 40. Dombroski, B. A. *et al.* Gene expression and genetic variation in response to endoplasmic  
849 reticulum stress in human cells. *Am. J. Hum. Genet.* **86**, 719–729 (2010).
- 850 41. Gale, E. A. & Gillespie, K. M. Diabetes and gender. *Diabetologia* **44**, 3–15 (2001).
- 851 42. Barker, D. J. P. The developmental origins of chronic adult disease. *Acta Paediatr. Oslo*  
852 *Nor.* 1992 *Suppl.* **93**, 26–33 (2004).
- 853 43. Stene, L. C. *et al.* Birth weight and childhood onset type 1 diabetes: population based cohort  
854 study. *BMJ* **322**, 889–892 (2001).
- 855 44. Böhmer, K. *et al.* Proinsulin autoantibodies are more closely associated with type 1 (insulin-  
856 dependent) diabetes mellitus than insulin autoantibodies. *Diabetologia* **34**, 830–834 (1991).
- 857 45. Røder, M. E., Porte, D., Schwartz, R. S. & Kahn, S. E. Disproportionately elevated  
858 proinsulin levels reflect the degree of impaired B cell secretory capacity in patients with  
859 noninsulin-dependent diabetes mellitus. *J. Clin. Endocrinol. Metab.* **83**, 604–608 (1998).

- 860 46. Wellcome Trust Case Control Consortium. Genome-wide association study of 14,000 cases  
861 of seven common diseases and 3,000 shared controls. *Nature* **447**, 661–678 (2007).
- 862 47. Bradfield, J. P. *et al.* A Genome-Wide Meta-Analysis of Six Type 1 Diabetes Cohorts  
863 Identifies Multiple Associated Loci. *PLoS Genet.* **7**, e1002293 (2011).
- 864 48. Purcell, S. *et al.* PLINK: a tool set for whole-genome association and population-based  
865 linkage analyses. *Am. J. Hum. Genet.* **81**, 559–575 (2007).
- 866 49. Das, S. *et al.* Next-generation genotype imputation service and methods. *Nat. Genet.* **48**,  
867 1284–1287 (2016).
- 868 50. Willer, C. J., Li, Y. & Abecasis, G. R. METAL: fast and efficient meta-analysis of  
869 genomewide association scans. *Bioinforma. Oxf. Engl.* **26**, 2190–2191 (2010).
- 870 51. Pers, T. H., Timshel, P. & Hirschhorn, J. N. SNPsnap: a Web-based tool for identification  
871 and annotation of matched SNPs. *Bioinforma. Oxf. Engl.* **31**, 418–420 (2015).
- 872 52. Bulik-Sullivan, B. *et al.* An atlas of genetic correlations across human diseases and traits.  
873 *Nat. Genet.* **47**, 1236–1241 (2015).
- 874 53. Wheeler, E. *et al.* Impact of common genetic determinants of Hemoglobin A1c on type 2  
875 diabetes risk and diagnosis in ancestrally diverse populations: A transethnic genome-wide  
876 meta-analysis. *PLoS Med.* **14**, e1002383 (2017).
- 877 54. Shungin, D. *et al.* New genetic loci link adipose and insulin biology to body fat distribution.  
878 *Nature* **518**, 187–196 (2015).
- 879 55. Felix, J. F. *et al.* Genome-wide association analysis identifies three new susceptibility loci for  
880 childhood body mass index. *Hum. Mol. Genet.* **25**, 389–403 (2016).
- 881 56. Wakefield, J. Bayes factors for genome-wide association studies: comparison with P-values.  
882 *Genet. Epidemiol.* **33**, 79–86 (2009).
- 883 57. Giambartolomei, C. *et al.* Bayesian test for colocalisation between pairs of genetic  
884 association studies using summary statistics. *PLoS Genet.* **10**, e1004383 (2014).

- 885 58. Hormozdiari, F. *et al.* Colocalization of GWAS and eQTL Signals Detects Target Genes.  
886 *Am. J. Hum. Genet.* **99**, 1245–1260 (2016).
- 887 59. Greenwald, W. *et al.* Pancreatic islet chromatin accessibility and conformation defines distal  
888 enhancer networks of type 2 diabetes risk. (Manuscript in preparation).
- 889 60. Li, H. & Durbin, R. Fast and accurate long-read alignment with Burrows-Wheeler transform.  
890 *Bioinforma. Oxf. Engl.* **26**, 589–595 (2010).
- 891 61. Zhang, Y. *et al.* Model-based analysis of ChIP-Seq (MACS). *Genome Biol.* **9**, R137 (2008).
- 892 62. Quinlan, A. R. & Hall, I. M. BEDTools: a flexible suite of utilities for comparing genomic  
893 features. *Bioinformatics* **26**, 841–842 (2010).
- 894 63. Ernst, J. & Kellis, M. ChromHMM: automating chromatin-state discovery and  
895 characterization. *Nat. Methods* **9**, 215–216 (2012).
- 896 64. Bailey, T. L. *et al.* MEME SUITE: tools for motif discovery and searching. *Nucleic Acids Res.*  
897 **37**, W202-208 (2009).
- 898 65. Rozowsky, J. *et al.* AlleleSeq: analysis of allele-specific expression and binding in a network  
899 framework. *Mol. Syst. Biol.* **7**, 522 (2011).
- 900 66. Grant, C. E., Bailey, T. L. & Noble, W. S. FIMO: scanning for occurrences of a given motif.  
901 *Bioinforma. Oxf. Engl.* **27**, 1017–1018 (2011).
- 902 67. Pique-Regi, R. *et al.* Accurate inference of transcription factor binding from DNA sequence  
903 and chromatin accessibility data. *Genome Res.* **21**, 447–455 (2011).
- 904 68. Bhandare, R. *et al.* Genome-wide analysis of histone modifications in human pancreatic  
905 islets. *Genome Res.* **20**, 428–433 (2010).
- 906 69. Khoo, C. *et al.* Research resource: the pdx1 cistrome of pancreatic islets. *Mol. Endocrinol.*  
907 *Baltim. Md* **26**, 521–533 (2012).
- 908 70. Stitzel, M. L. *et al.* Global epigenomic analysis of primary human pancreatic islets provides  
909 insights into type 2 diabetes susceptibility loci. *Cell Metab.* **12**, 443–455 (2010).

- 910 71. Wang, A. *et al.* Epigenetic priming of enhancers predicts developmental competence of  
911 hESC-derived endodermal lineage intermediates. *Cell Stem Cell* **16**, 386–399 (2015).
- 912 72. Harvey, C. T. *et al.* QuASAR: quantitative allele-specific analysis of reads. *Bioinformatics*  
913 **31**, 1235–1242 (2015).
- 914 73. van de Geijn, B., McVicker, G., Gilad, Y. & Pritchard, J. K. WASP: allele-specific software  
915 for robust molecular quantitative trait locus discovery. *Nat. Methods* **12**, 1061–1063 (2015).
- 916

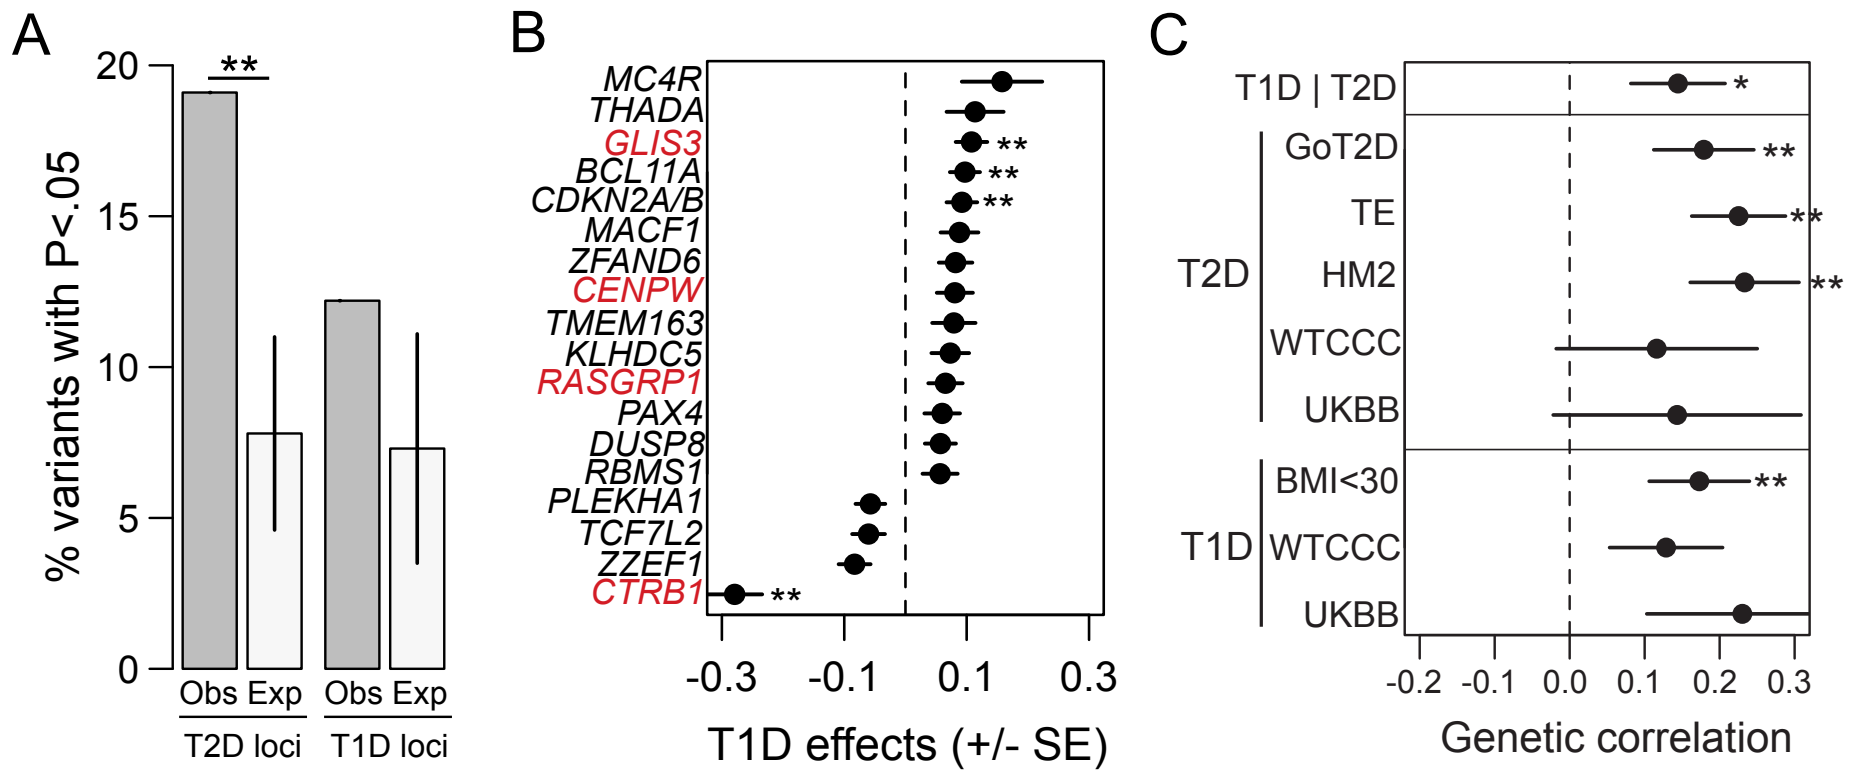

**Figure 1. Genetic variants have shared effects on T1D and T2D risk.**

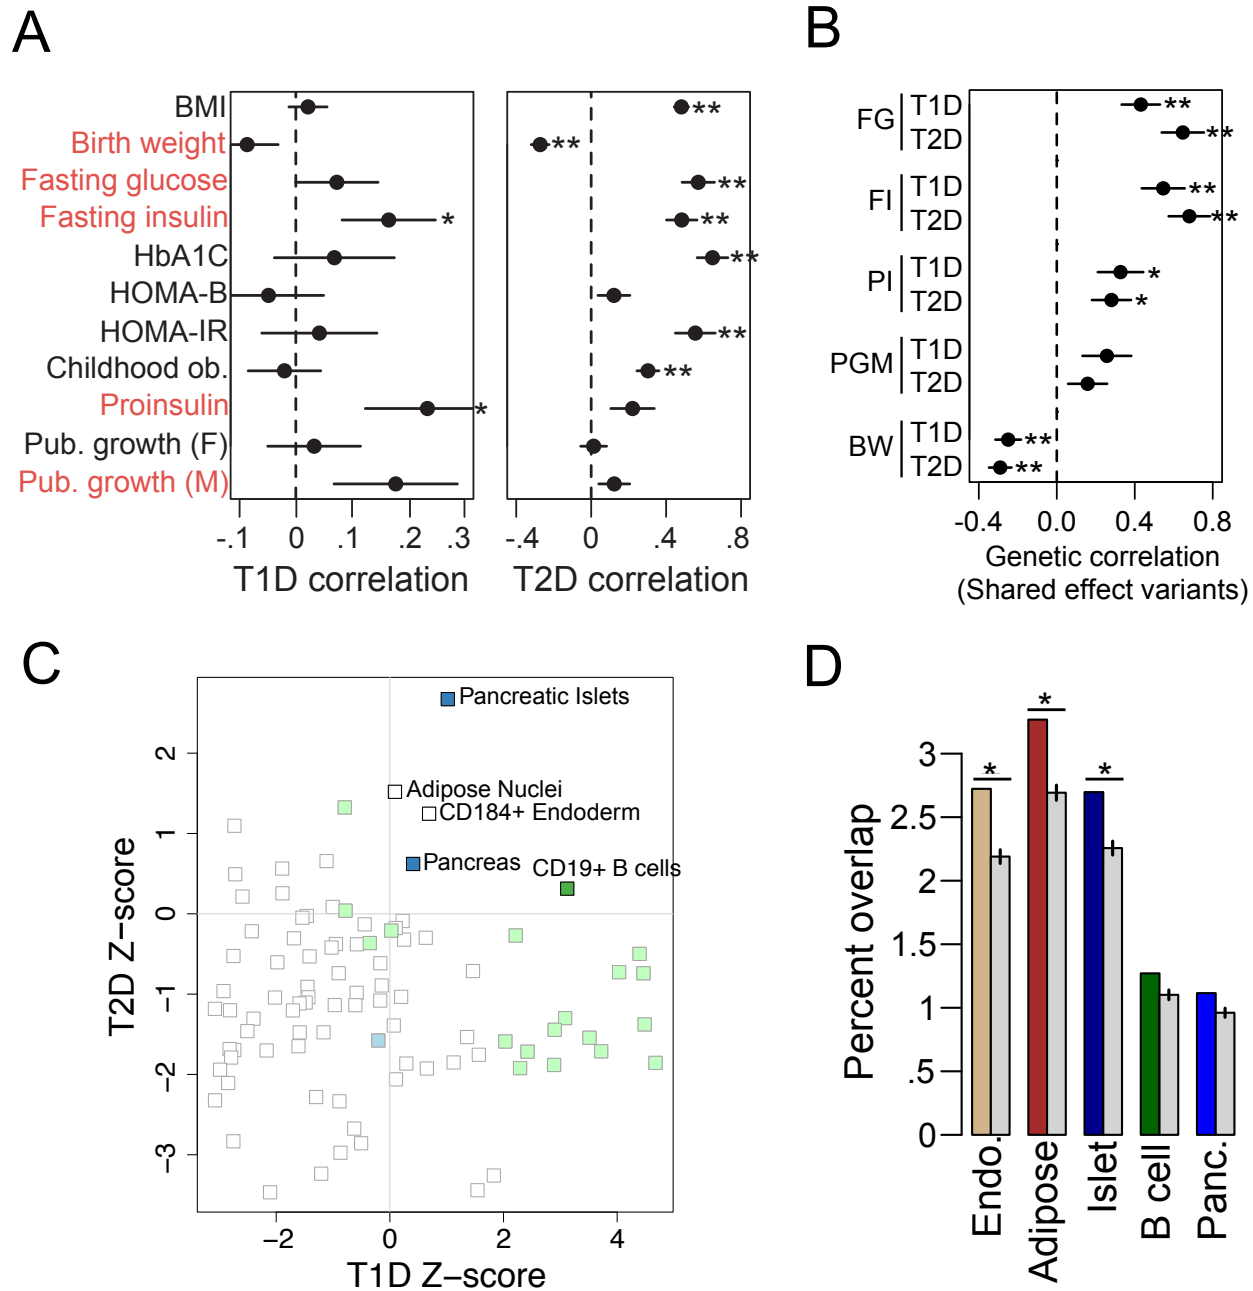

**Figure 2. Mechanisms of shared variant effects on T1D and T2D risk.**



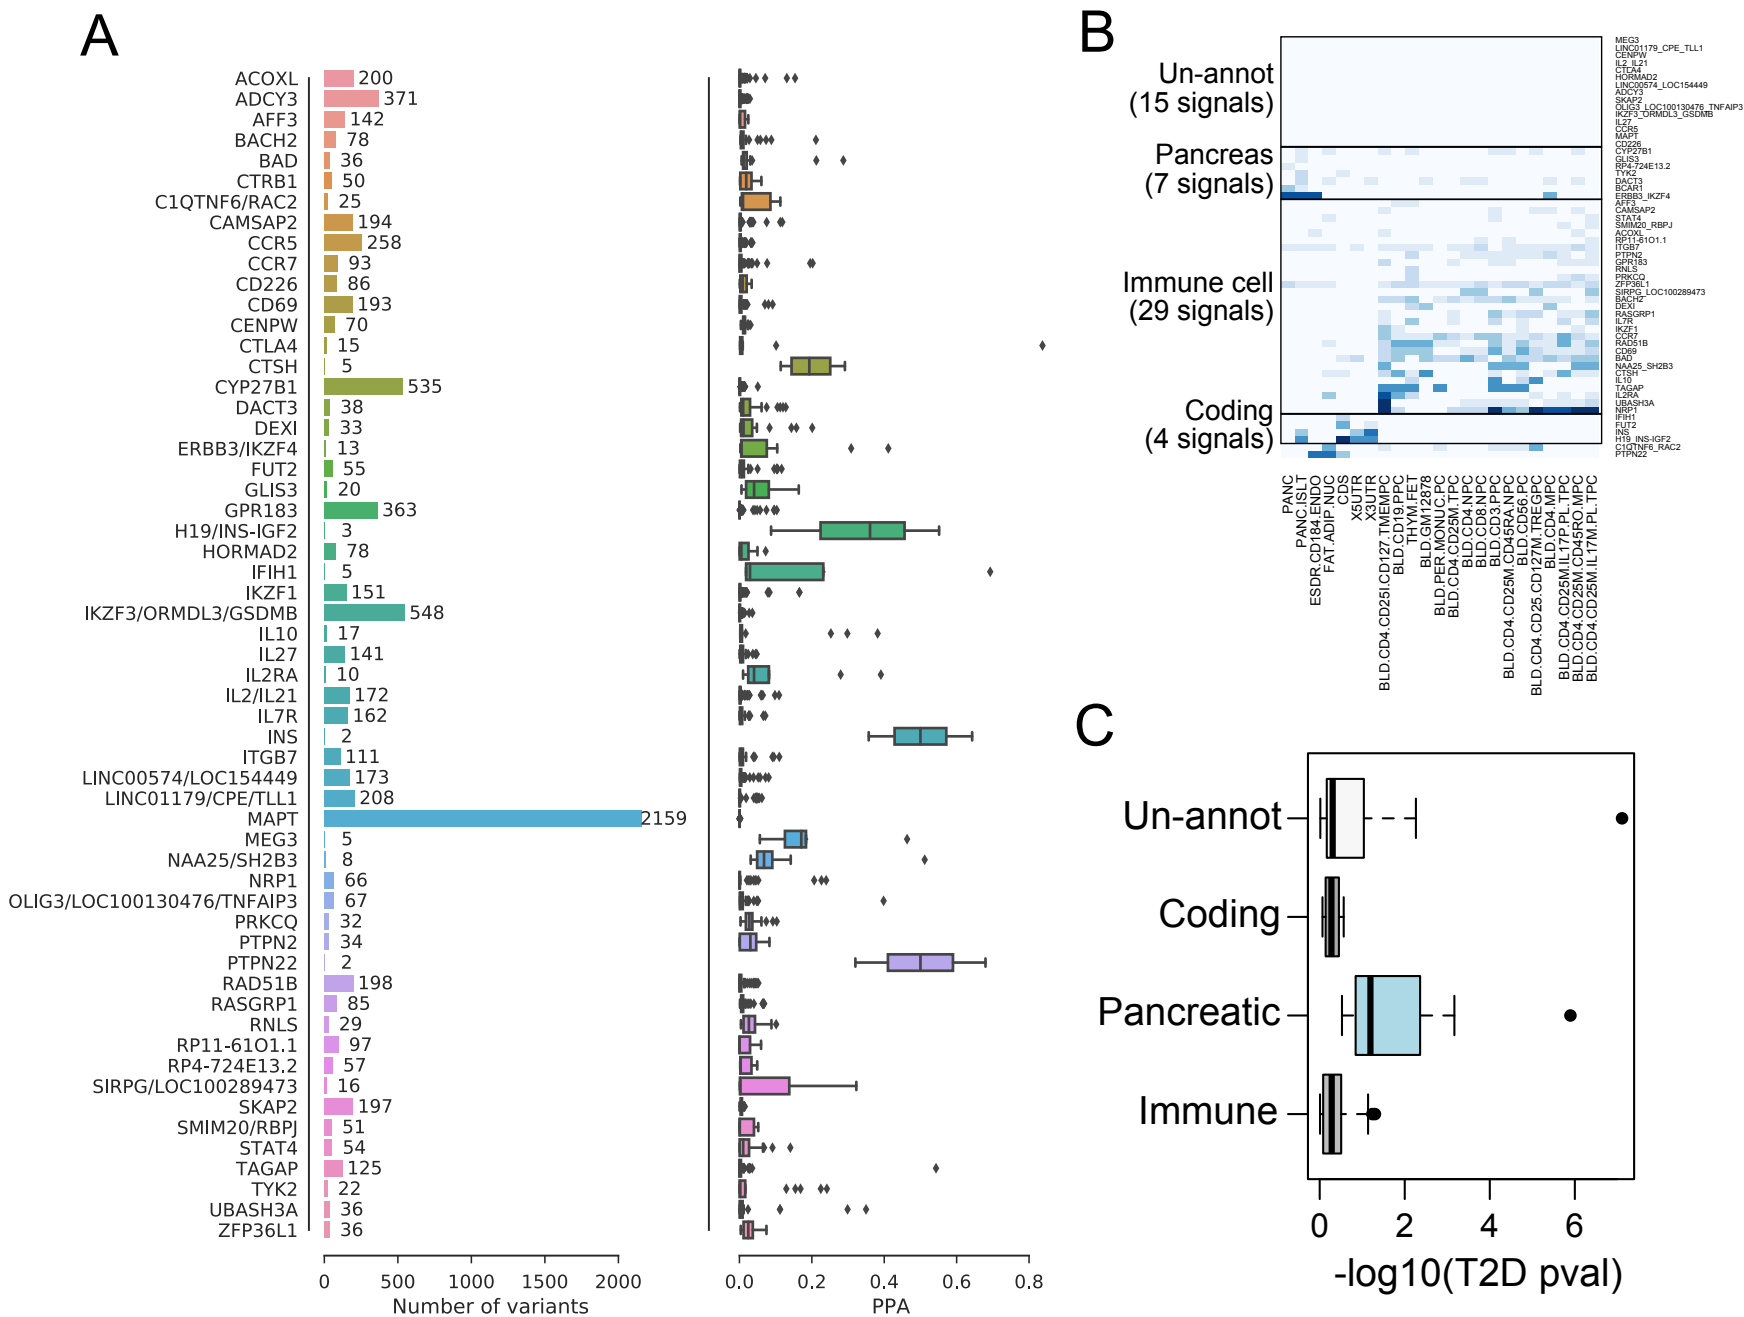

**Figure 3. Fine-mapping and functional annotation of known T1D risk loci**

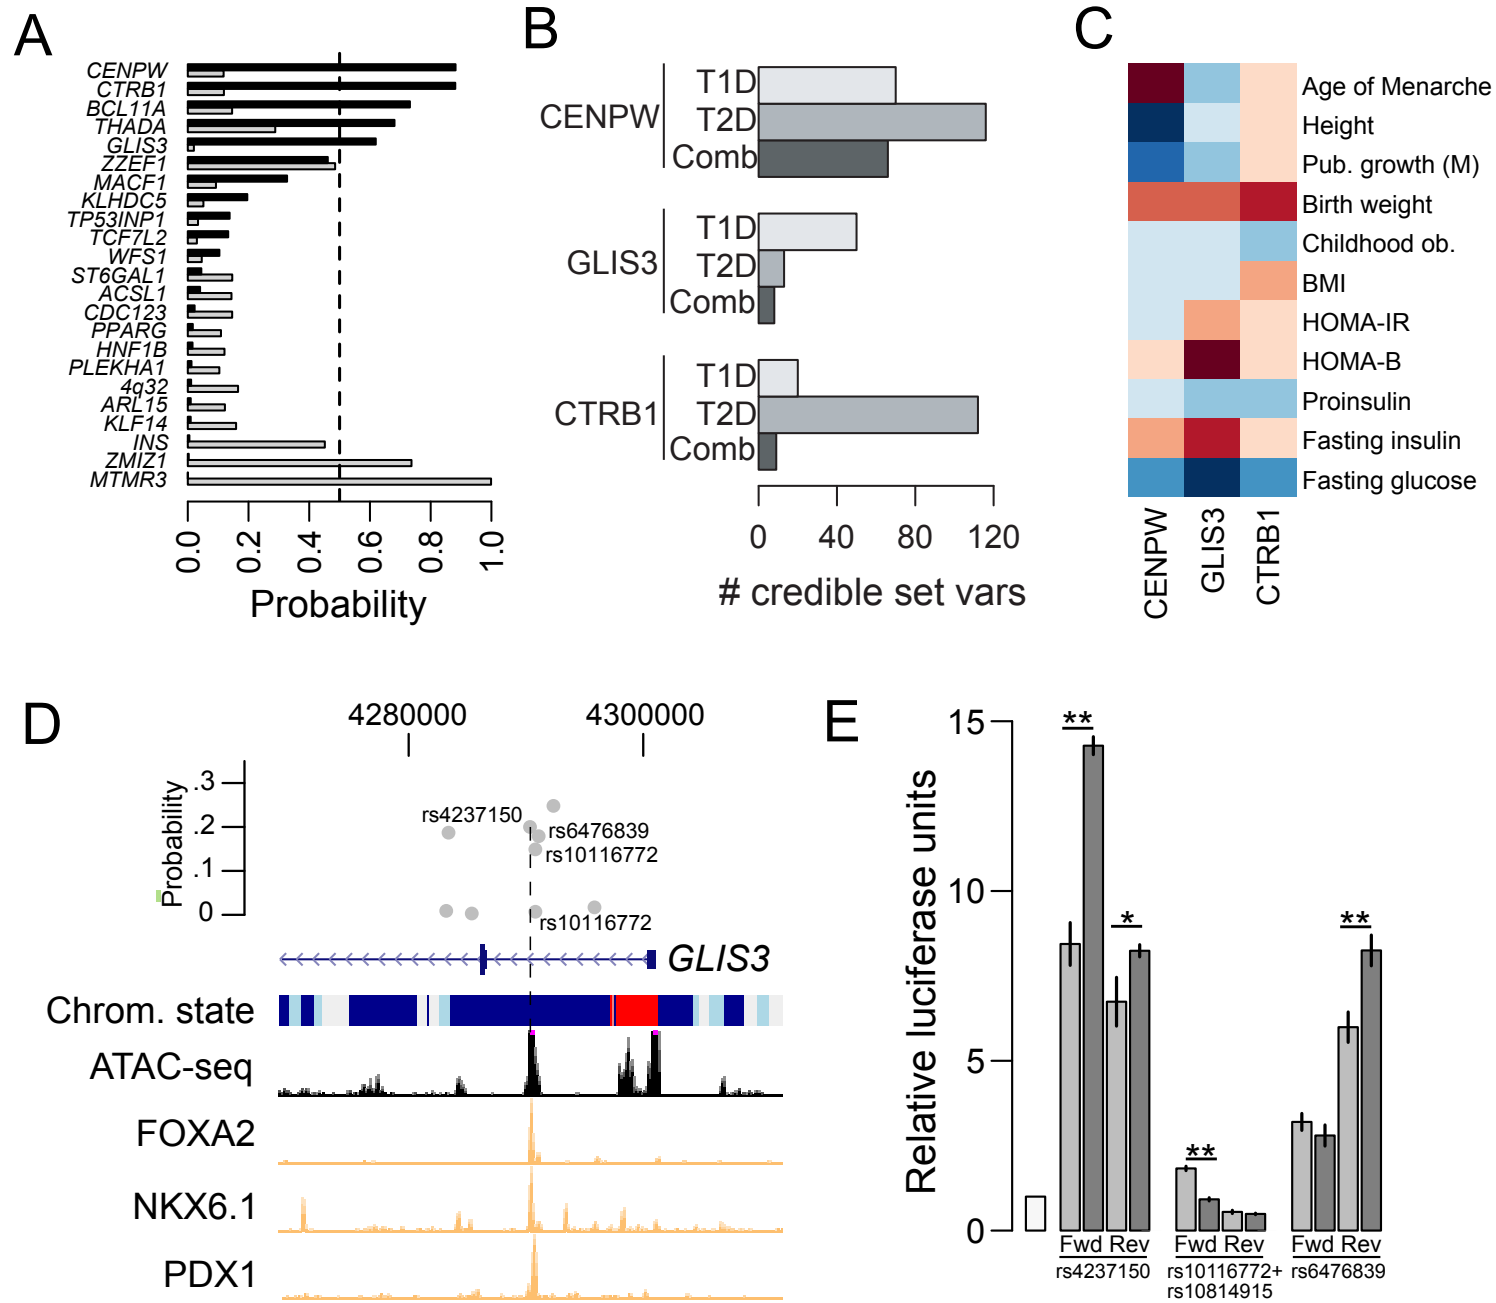

**Figure 4. Shared T1D and T2D risk variants at *GLIS3* affect regulatory activity in islets.**

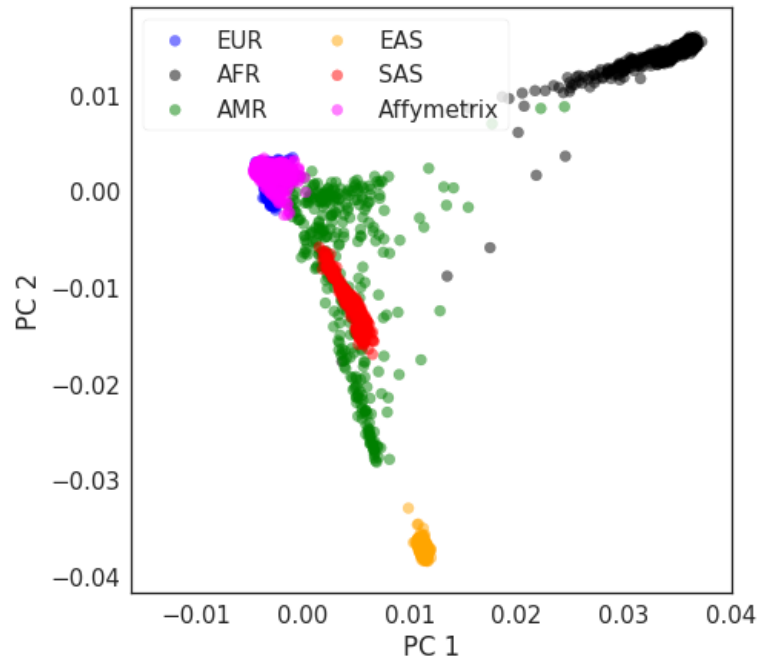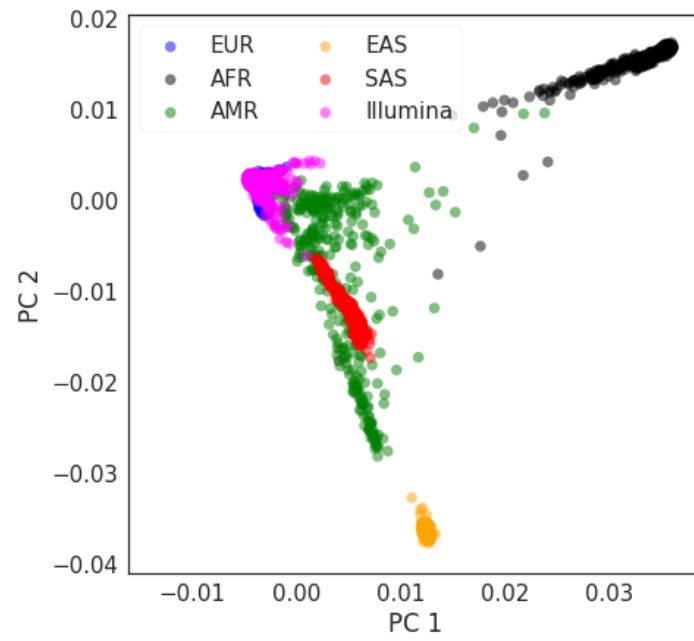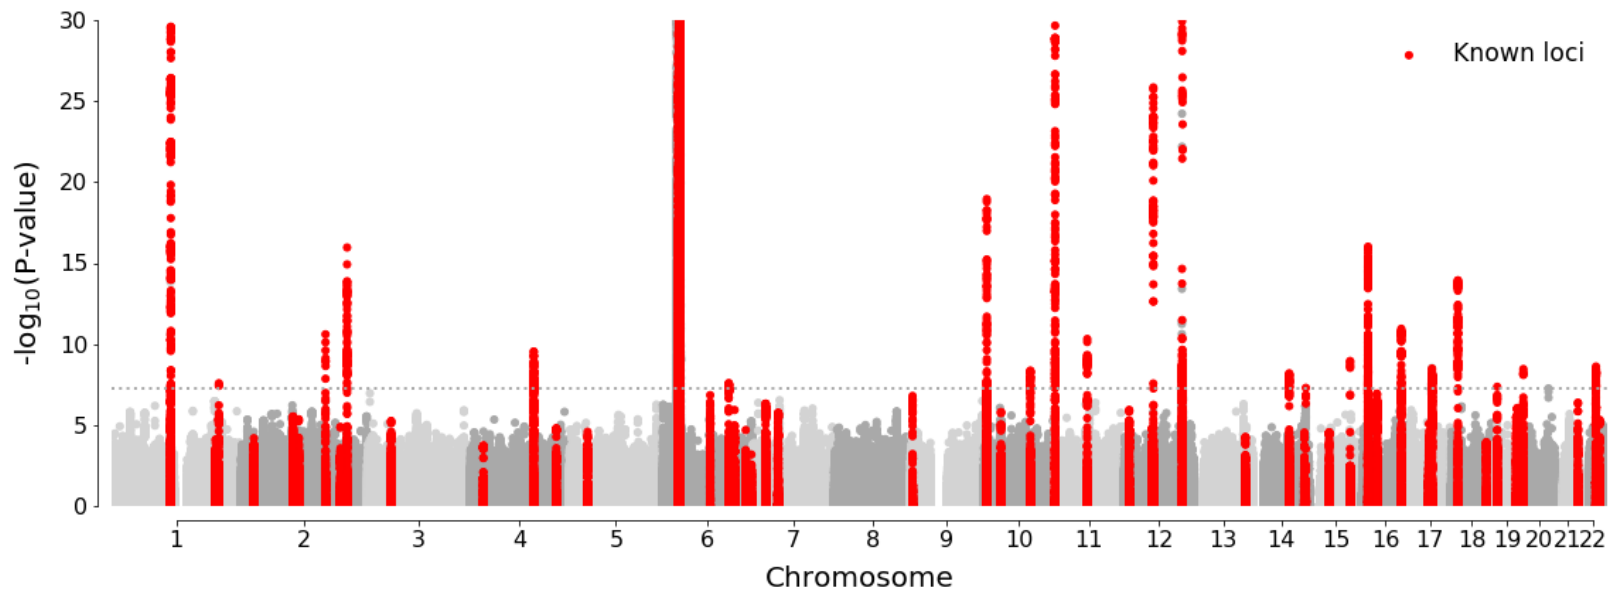

**Supplemental Figure 1. Genome-wide association study of T1D case and control samples**



*GLIS3*

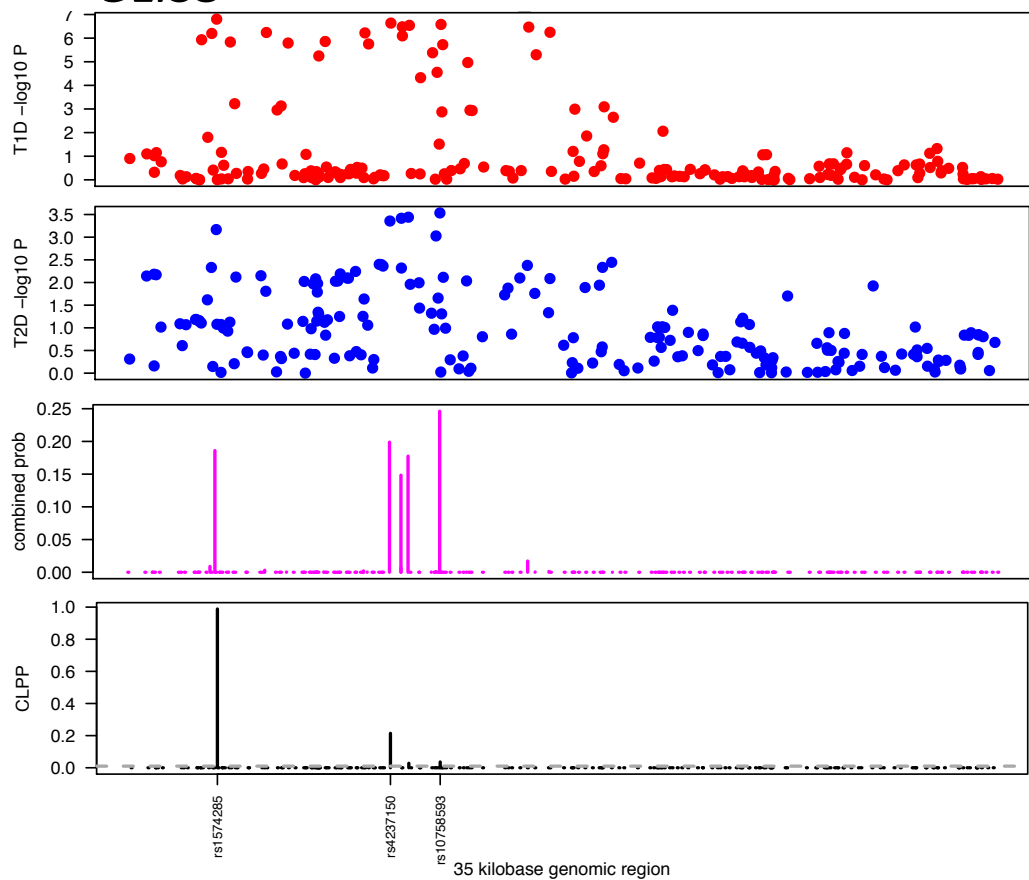

*CTRB1*

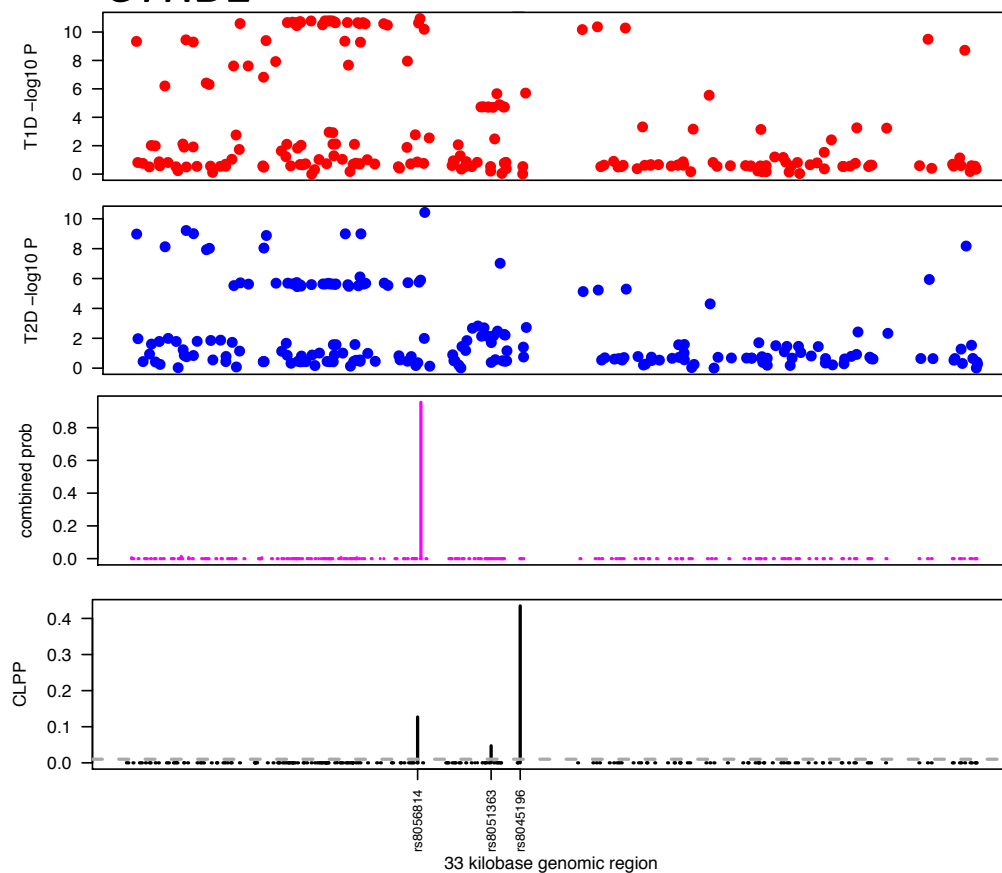

**Supplemental Figure 3. Loci with shared T1D and T2D risk variants**

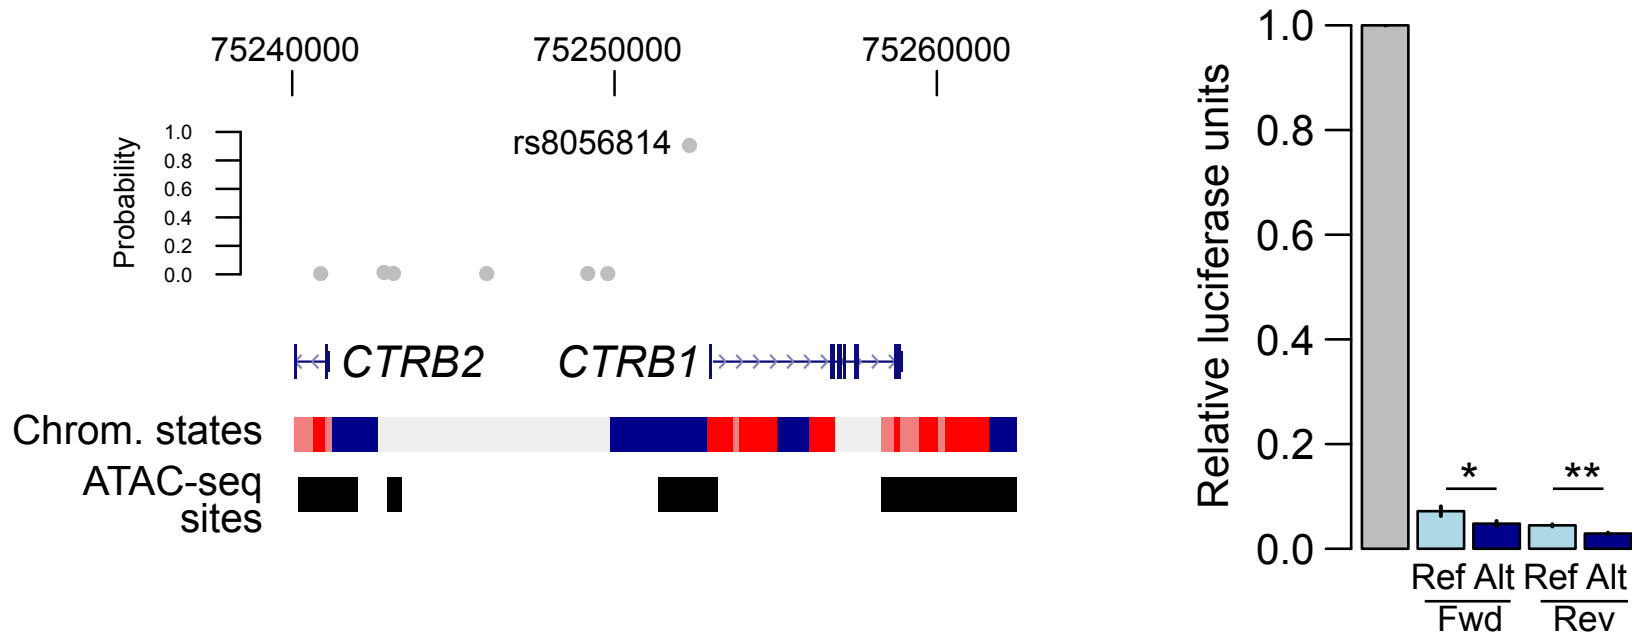

**Supplemental Figure 4. Shared T1D and T2D islet regulatory variant at the *CTRB1* locus**

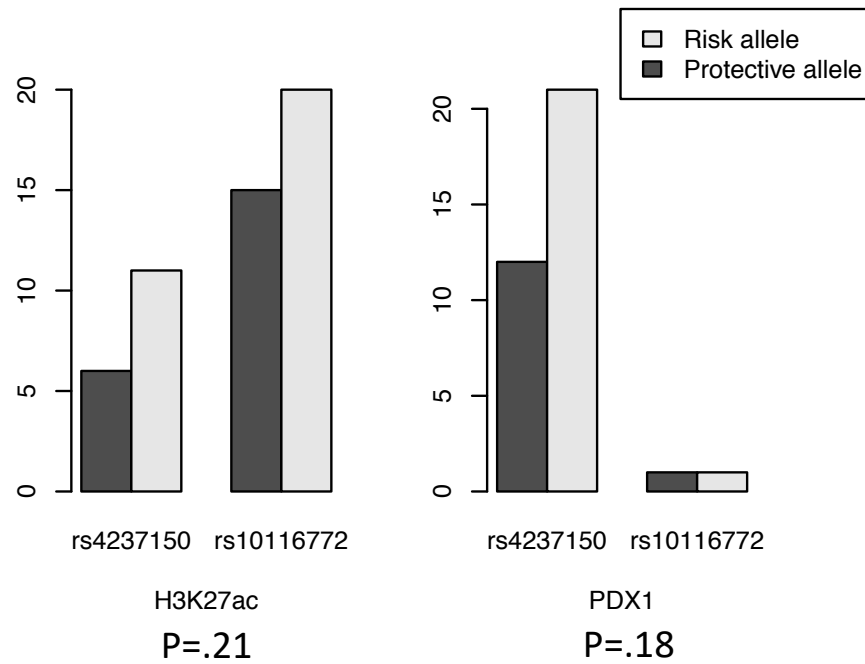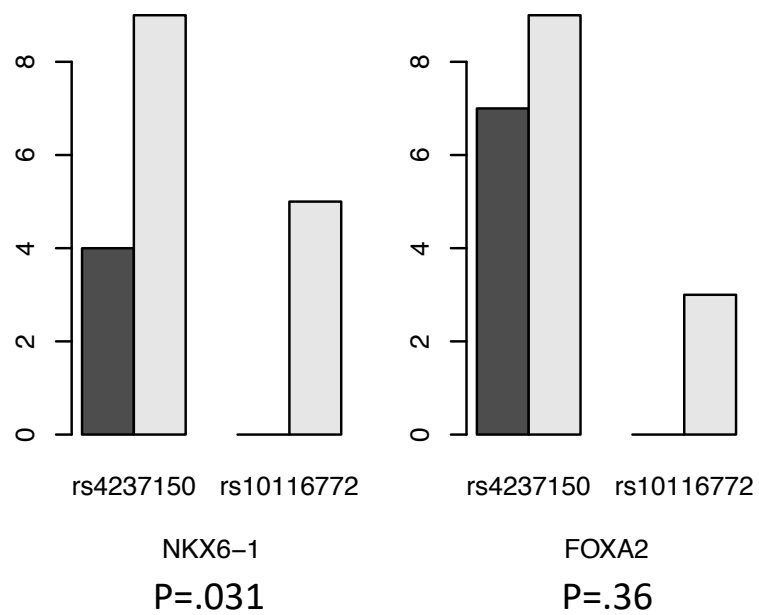

**Supplemental Figure 5. Allelic imbalance in islet regulatory activity at *GLIS3***
